# Supplementary material for: Cationic Intrinsically Disordered Antimicrobial Peptides (CIDAMPs) Represent a New Paradigm of Innate Defense with a Potential for Novel Anti-Infectives
Source: PubMed Central journal article supplement (PMC6399351; doi:10.1038/s41598-019-39219-w), 2019-03-04
Supplement: 41598_2019_39219_MOESM1_ESM.pdf [file 41598_2019_39219_MOESM1_ESM.pdf]

## SUPPLEMENTARY MATERIAL

**Cationic Intrinsically Disordered Antimicrobial Peptides (CIDAMPs) Represent a New Paradigm of Innate Defense with a Potential for Novel Anti-Infectives**

**Ties Latendorf<sup>1,§</sup> , Ulrich Gerstel<sup>1,§</sup>, Zhihong Wu<sup>1,□</sup>, Joachim Bartels<sup>1</sup>, Alexander Becker<sup>2</sup>, Andreas Tholey<sup>2</sup>, Jens-Michael Schröder<sup>1,\*</sup>**

1 Dpt. of Dermatology, University-Hospital Schleswig-Holstein, Campus Kiel, Kiel, Germany

2 Institute for Experimental Medicine – AG Systematic Proteomics & Bioanalytics, Kiel University (CAU), Kiel, Germany

\* corresponding author

□ present address: Institute of Biochemistry and Cell Biology, Zhejiang University of Science and Technology, 310023 Hangzhou, China

§ equal contribution

**Corresponding author:** Jens-M. Schröder, University-Hospital Schleswig-Holstein, Dpt. of Dermatology, Rosalind-Franklin-Str. 7, D-24105 Kiel, Germany, +49 431 500 – 2101, FAX – 21104, Email: jschroeder@dermatology.uni-kiel.de

Supplementary Figure 1

```

340      350      360      370      380      400      410      420      430      440      450      460
YSYSRGHYES GSGQTSGFQO HESSSGQSSG YSKHSGSGGR SSSGQHGST SGQASSSGQH GQHEASRHS SGRGQHSSGS QSPGHQRG SSGQSPSSG QHGTGFRSS SSGPYVSGG
SRGHYES GSGQTSGFQO HESSSGQSSG Y
SRGHYES GSGQTSGFQO HESSSGQSSG
ES GSGQTSGFQO HESSSGQSSG Y
HS SGRGQHSSGS QSPGHQRG SSGQSPSSG QHGTGFRSS SSGPY
HS SGRGQHSSGS QSPGHQRG SSGQSPSSG QHGTGFRSS SSGP
HS SGRGQHSSGS QSPGHQRG SSGQSPSSG QHGTGFR
HS SGRGQHSSGS QSPGHQRG SSGQSPSSG QHGTGFR
HS SGRGQHSSGS QSPGHQRG SSGQSPSSG QHGTGFR
SGRQHSSGS QSPGHQRG SSGQSPSSG QHGTGFR
GRGQHSSGS QSPGHQRG SSGQSPSSG QHGTGFR
GRGQHSSGS QSPGHQRG SSGQSPSSG QHGTGFR
SSGS QSPGHQRG SSGQSPSSG QHGTGFR
GS QSPGHQRG SSGQSPSSG QHGTGFR

500      510      520      530      540      550      560      570
HCOHGSRSGO SSRGERQSS AGSSSSYGQH GSGSRQSLGR SRHSGSGQS PPSRGRHES GSFQSSSYGP HG YGSGRSSS
SQ SSRGERQSS AGSSSSYGQH GSGSRQSLGR S HSGSGQS PPSRGRHES GSFQSSSYGP HG
GERQSS AGSSSSYGQH GSGSRQSLGR S
GERQSS AGSSSSYGQH GSGSRQSL

680      690      700      710      720      730      740      750      760      770      780
HSSSYGQHS GSGWSSNGP HGSVSGQSSG FGHKSGSGQS SGYSOHGSGS SHSSGQRHG SRSGQSRSE QHGSSGLSS SYGQHSGSH QSSGHRQSS GSHGSPSRV
GQHS GSGWSSNGP HGSVSGQSSG FGHKSGSGQS SG
SSSNGP HGSVSGQSSG FGHKSGSGQS SGYSOHGSGS SHSSGY SQSSRSE QHGSSGLSS SYGQHSGSH QSSGHRQSS GSHGSPSRV
SSSNGP HGSVSGQSSG FGHKSGSGQS SGY SE QHGSSGLSS SYGQHSGSH QSSGHRQSS GSHGSP
SSSNGP HGSVSGQSSG FGHKSGSGQS SG
SSNGP HGSVSGQSSG FGHKSGSGQS SGYS
SSNGP HGSVSGQSSG FGHKSGSGQS SGY
SNP HGSVSGQSSG FGHKSGSGQS SGY
NGP HGSVSGQSSG FGHKSGSGQS SGY
SSG FGHKSGSGQS SGYSOHGSGS SHSSGY

920      930      940      950      960      970
SGSGRSSSSG RHGSGSQSS GFGHKSSSQ SSGYTOHGSG SGHSSSYEQH GSRSGQSSRS
SSSSG RHGSGSQSS GFGHKSSSQ SSGYTOHGSG SGHSSSYEQH GS
SSSSG RHGSGSQSS GFGHKSSSQ SSGYTOHG
SSSSG RHGSGSQSS GFGHKSSSQ SSGYTOH
SSSSG RHGSGSQSS GFGHKSSSQ SSGYI
SSSSG RHGSGSQSS GFGHKSSSQ SSGY
SSG RHGSGSQSS GFGHKSSSQ SSGYTOH

980      990      1000      1010      1020      1030      1040      1050      1060      1070      1080
RCHGSSSGSS SSYGQHGSG RQSLGHQHG SSGSQSPSPS RGRHSGSGO SSSYGPVRSQ SGWSSSRGPY ESGSGHSSGL GHRESRQSS SGYQHGSSS GHSSTHQHG
HSSSSGS SSYGQHGSG RQSLGHQHG SSGSQSPSPS RGPY ESGSGHSSGL GHRESR
HSSSSGS SSYGQHGSG RQSL ESGSGHSSGL GHRESRQSS SGYQHGSSS GHSSTHQHG
QSLGHQHG SSGSQSPSPS RGRHSGSGO SSSY
GHQHG SSGSQSPSPS RGRHSGSGO SSSYGPY
GHQHG SSGSQSPSPS RGRHSGSGO SSSYGP
HGQHG SSGSQSPSPS RGRHSGSGO SSSYGPY
HG SSGSQSPSPS RGRHSGSGO SSSYGPY
G SSGSQSPSPS RGRHSGSGO SSSYGPY
SSSQSPSPS RGRHSGSGO SSSYGPY
SSSQSPSPS RGRHSGSGO SSSYGP

1110      1120      1130      1140      1150      1160      1170      1180      1190      1200
SHQRGSGSS QSSGQHGGS RSGQSPHGO RSGSRQSPS YGRHSGSGR SSSGQHGSG LGESSGFHH ESSSQSSS SQHSGSGHS SCYQHGGS
QSPS YGRHSGSGR SSSGQHGSG LGESSGFHH ESSSQSSS
QSPS YGRHSGSGR SSSGQHGSG LGESSGFHH E
QSPS YGRHSGSGR SSSGQHGSG LGE
GRHSGSGR SSSGQHGSG LGESSGFHH ESSSQSSY
GRHSGSGR SSSGQHGSG LGESSGFHH ESSSQSSS
GRHSGSGR SSSGQHGSG LGESSGFHH ESSSQSS
CRHSGSGR SSSGQHGSG LGESSGFHH ESSSQS
GRHSGSGR SSSGQHGSG LGESSGFHH ESSSG
GRHSGSGR SSSGQHGSG LGESSGFHH ESS
GRHSGSGR SSSGQHGSG LGESSGFHH ES
GRHSGSGR SSSGQHGSG LGESSGFHH E
RHSGSGR SSSGQHGSG LGESSGFHH ESSSQSSS
HGSGR SSSGQHGSG LGESSGFHH ESSSQSSS
GSGR SSSGQHGSG LGESSGFHH ESSSQSSS
SSSGQHGSG LGESSGFHH ESSSQSSY SQHSGSGHS SCYQHGGS
SSSGQHGSG LGESSGFHH ESSSQSSS
SSSGQHGSG LGESSGFHH ESSSQSSS
SSSGQHGSG LGESSGFHH ESSSQSS
SSSGQHGSG LGESSGFHH ESSSQS
SSSGQHGSG LGESSGFHH ESSSQ
SSSGQHGSG LGESSGFHH ESSSG
SSSGQHGSG LGESSGFHH ESSS
SSSGQHGSG LGESSGFHH ESS
SSSGQHGSG LGESSGFHH ES
SSSGQHGSG LGESSGFHH E
SSSGQHGSG LGESSGFHH
SSGQHGSG LGESSGFHH ESSSQSSS
SQHGSG LGESSGFHH ESSSQSSS
GHGSG LGESSGFHH ESSSQSSS
HSG LGESSGFHH ESSSQSSS

```

Supplementary Figure 1, continued

|                    |                   |                   |                   |                   |                    |                  |
|--------------------|-------------------|-------------------|-------------------|-------------------|--------------------|------------------|
| 1250               | 1260              | 1270              | 1280              | 1290              | 1300               |                  |
| <u>HSPSRGRHGS</u>  | <u>GLGHSSSHGQ</u> | <u>HGSSGGRSSS</u> | <u>RGPYRSGH</u>   | <u>SSVFGQHESG</u> | <u>SGHSSAYSDF</u>  |                  |
| GRHGS              | GLGHSSSHGQ        | HGSSGGRSSS        | RGPYE             |                   |                    |                  |
| GRHGS              | GLGHSSSHGQ        | HGSSGGRSSS        | RGPY              |                   |                    |                  |
| HGS                | GLGHSSSHGQ        | HGSSGGRSSS        | RGPYE             |                   |                    |                  |
| HGS                | GLGHSSSHGQ        | HGSSGGRSSS        | RGPY              |                   |                    |                  |
| GS                 | GLGHSSSHGQ        | HGSSGGRSSS        | RGPY              |                   |                    |                  |
|                    | GLGHSSSHGQ        | HGSSGGRSSS        | RGPY              |                   |                    |                  |
|                    |                   |                   | ESRSGH            | SSVFGQHESG        | SGHSSAY            |                  |
|                    |                   |                   | ESRSGH            | SSVFGQHESG        | SGHSSA             |                  |
|                    |                   |                   | ESRSGH            | SSVFGQHESG        | SGHS               |                  |
|                    |                   |                   | ESRSGH            | SSVFGQHESG        | SGH                |                  |
|                    |                   |                   | SGH               | SSVFGQHESG        | SGHSSAY            |                  |
|                    |                   |                   | SGH               | SSVFGQHESG        | SGHSSA             |                  |
| 1360               | 1370              | 1380              | 1390              | 1400              | 1410               |                  |
| <u>RHRGSGQSP</u>   | <u>SRGRHGSQSG</u> | <u>HSSSYGQHGS</u> | <u>GSQSSSSGR</u>  | <u>HGSSGQSSG</u>  | <u>FGHHSSSAQ</u>   |                  |
| SP                 | SRGRHGSQSG        | HSSSYGQHGS        | GSQSS             |                   |                    |                  |
|                    | RGRHGSQSG         | HSSSYGQHGS        | GSQSS             |                   |                    |                  |
|                    | GRHGSQSG          | HSSSYGQHGS        | GSQSSSSGR         | HGSSGQSSG         | FGHHES             |                  |
|                    | GRHGSQSG          | HSSSYGQHGS        | GSQSSSSSSGR       | HGSSGQSSG         | FGHHE              |                  |
|                    | GRHGSQSG          | HSSSYGQHGS        | GSQSSSSSSGR       | HG                |                    |                  |
|                    | GRHGSQSG          | HSSSYGQHGS        | GSQSSSSSSGR       |                   |                    |                  |
|                    | GRHGSQSG          | HSSSYGQHGS        | GSQSS             |                   |                    |                  |
|                    | GRHGSQSG          | HSSSYGQHGS        | GSQSS             |                   |                    |                  |
|                    | HGSSGQ            | HSSSYGQHGS        | GSQSSSSSSGR       | HGSSGQSSG         | FGHHES             |                  |
|                    | HGSSGQ            | HSSSYGQHGS        | GSQSSSSSSGR       | HGSSGQSSG         | FGHHES             |                  |
|                    | HGSSGQ            | HSSSYGQHGS        | GSQSSSSSSGR       | HGSSGQSSG         | FGHHE              |                  |
|                    | HGSSGQ            | HSSSYGQHGS        | GSQSS             |                   |                    |                  |
|                    |                   | QGHGS             | GSQSSSSSSGR       | HGSSGQSSG         | FGHHES             |                  |
|                    |                   | QGHGS             | GSQSSSSSSGR       | HGSSGQSSG         | FGHHES             |                  |
|                    |                   | QGHGS             | GSQSSSSSSGR       | HGSSGQSSG         | FGHHES             |                  |
|                    |                   | QGHGS             | GSQSSSSSSGR       | HGSSGQSSG         | FGHHE              |                  |
|                    |                   | QGHGS             | GSQSSSSSSGR       | HGSSGQSSG         | FGHH               |                  |
|                    |                   | GS                | GSQSSSSSSGR       | HGSSGQSSG         | FGHHE              |                  |
|                    |                   |                   | SSSSGR            | HGSSGQSSG         | FGHHES             |                  |
|                    |                   |                   | SSSSGR            | HGSSGQSSG         | FGHHES             |                  |
|                    |                   |                   | SGR               | HGSSGQSSG         | FGHHES             |                  |
|                    |                   |                   | GR                | HGSSGQSSG         | FGHHES             |                  |
|                    |                   |                   |                   | HGSSGQSSG         | FGHHES             |                  |
| 1440               | 1450              | 1460              | 1470              | 1480              | 1490               | 1500             |
| <u>GSRSGQSSRG</u>  | <u>ERHGSSSGSS</u> | <u>SSYGQHGS</u>   | <u>RQSLGHGQHG</u> | <u>SGSGQSPSPS</u> | <u>RGRHGSQSSQ</u>  | <u>SSSYSPYGS</u> |
| G                  | ERHGSSSGSS        | SSYGQHGS          | RQSL              |                   |                    |                  |
|                    | HGSSSSGSS         | SSYGQHGS          | RQSLGHGQHG        | SGSGQSPSPS        |                    |                  |
|                    | HGSSSSGSS         | SSYGQHGS          | RQSL              |                   |                    |                  |
|                    |                   |                   | QSLGHGQHG         | SGSGQSPSPS        | RGRHGSQSSQ         | SSSY             |
|                    |                   |                   | GHGQHG            | SGSGQSPSPS        | RGRHGSQSSQ         | SSSYSPY          |
| 1610               | 1620              | 1630              | 1640              | 1650              | 1660               | 1670             |
| <u>RGSQSSRQSPS</u> | <u>YGRHGSQSGR</u> | <u>SSSSGQHGS</u>  | <u>LGESSGFGRH</u> | <u>ESSSGQSSSY</u> | <u>SGHGSQSSGHS</u> | <u>SGYGQHGSS</u> |
| QSPS               | YGRHGSQSGR        | SSSSGQHGS         | LGESSGFGRH        | ESSSGQSSS         |                    |                  |
| QSPS               | YGRHGSQSGR        | SSSSGQHGS         | LGESSGFGRH        | E                 |                    |                  |
| QSPS               | YGRHGSQSGR        | SSSSGQHGS         | LGESSGFGRH        | ESSSGQSSSY        |                    |                  |
|                    | GRHGSQSGR         | SSSSGQHGS         | LGESSGFGRH        | ESSSGQSSS         |                    |                  |
|                    | GRHGSQSGR         | SSSSGQHGS         | LGESSGFGRH        | ESSSGQSSS         |                    |                  |
|                    | GRHGSQSGR         | SSSSGQHGS         | LGESSGFGRH        | ESSSGQSS          |                    |                  |
|                    | GRHGSQSGR         | SSSSGQHGS         | LGESSGFGRH        | ESSSG             |                    |                  |
|                    | GRHGSQSGR         | SSSSGQHGS         | LGESSGFGRH        | ESS               |                    |                  |
|                    | GRHGSQSGR         | SSSSGQHGS         | LGESSGFGRH        | ES                |                    |                  |
|                    | GRHGSQSGR         | SSSSGQHGS         | LGESSGFGRH        | E                 |                    |                  |
|                    | RHGSQSGR          | SSSSGQHGS         | LGESSGFGRH        | ESSSGQSSS         |                    |                  |
|                    | HGSSQSGR          | SSSSGQHGS         | LGESSGFGRH        | ESSSGQSSS         |                    |                  |
|                    | GSGSGR            | SSSSGQHGS         | LGESSGFGRH        | ESSSGQSSS         |                    |                  |
|                    |                   | SSSSGQHGS         | LGESSGFGRH        | ESSSGQSSSY        | SGHGSQSSGHS        | SGYGQHGSS        |
|                    |                   | SSSSGQHGS         | LGESSGFGRH        | ESSSGQSSSY        |                    |                  |
|                    |                   | SSSSGQHGS         | LGESSGFGRH        | ESSSGQSSS         |                    |                  |
|                    |                   | SSSSGQHGS         | LGESSGFGRH        | ESSSGQSS          |                    |                  |
|                    |                   | SSSSGQHGS         | LGESSGFGRH        | ESSSGQ            |                    |                  |
|                    |                   | SSSSGQHGS         | LGESSGFGRH        | ESSSG             |                    |                  |
|                    |                   | SSSSGQHGS         | LGESSGFGRH        | ESSS              |                    |                  |
|                    |                   | SSSSGQHGS         | LGESSGFGRH        | ESS               |                    |                  |
|                    |                   | SSSSGQHGS         | LGESSGFGRH        | ES                |                    |                  |
|                    |                   | SSSSGQHGS         | LGESSGFGRH        | E                 |                    |                  |
|                    |                   | SSSGQHGSS         | LGESSGFGRH        | ESSSGQSSS         |                    |                  |
|                    |                   | SGQHGSS           | LGESSGFGRH        | ESSSGQSSS         |                    |                  |
|                    |                   | GQHGSS            | LGESSGFGRH        | ESSSGQSSS         |                    |                  |
|                    |                   | HGSS              | LGESSGFGRH        | ESSSGQSSS         |                    |                  |

Supplementary Figure 1, continued

|                   |                   |                   |                   |                   |                   |                   |                   |                   |               |
|-------------------|-------------------|-------------------|-------------------|-------------------|-------------------|-------------------|-------------------|-------------------|---------------|
| 1710              | 1720              | 1730              | 1740              | 1750              | 1760              | 1770              | 1780              | 1790              |               |
| <u>GHGROGSGSG</u> | <u>QSPSRGRHGS</u> | <u>GLGHSSSHGQ</u> | <u>HGSGSGRSGS</u> | <u>RGPYESRSGH</u> | <u>SSVFGQHESG</u> | <u>SGHSSAYSQH</u> | <u>GSGSGHPCSQ</u> | <u>GDHGSTSGQS</u> | <u>STEDOR</u> |
|                   | GRHGS             | GLGHSSSHGQ        | HGSGSGRSGS        | RGPYE             |                   |                   |                   |                   |               |
|                   | GRHGS             | GLGHSSSHGQ        | HGSGSGRSGS        | RGPY              |                   |                   |                   |                   |               |
|                   | HGS               | GLGHSSSHGQ        | HGSGSGRSGS        | RGPYE             |                   |                   |                   |                   |               |
|                   | HGS               | GLGHSSSHGQ        | HGSGSGRSGS        | RGPY              |                   |                   |                   |                   |               |
|                   | GS                | GLGHSSSHGQ        | HGSGSGRSGS        | RGPY              |                   |                   |                   |                   |               |
|                   |                   | GLGHSSSHGQ        | HGSGSGRSGS        | RGPY              |                   |                   |                   |                   |               |
|                   |                   |                   |                   | ESRSGH            | SSVFGQHESG        | SGHSSAY           |                   |                   |               |
|                   |                   |                   |                   | ESRSGH            | SSVFGQHESG        | SGHSSA            |                   |                   |               |
|                   |                   |                   |                   | ESRSGH            | SSVFGQHESG        | SGHS              |                   |                   |               |
|                   |                   |                   |                   | ESRSGH            | SSVFGQHESG        | SGH               |                   |                   |               |
|                   |                   |                   |                   | SGH               | SSVFGQHESG        | SGHSSAY           |                   |                   |               |
|                   |                   |                   |                   | SGH               | SSVFGQHESG        | SGHSSA            |                   |                   |               |
| 1810              | 1820              | 1830              | 1840              | 1850              | 1860              | 1870              | 1880              |                   |               |
| <u>GOSSSHGQHG</u> | <u>SGSSQSSSYG</u> | <u>QOGSGSGQSP</u> | <u>SRGRHGSGSG</u> | <u>HSSSYGQHGS</u> | <u>GSGWSSSSGR</u> | <u>HGSGSGQSSG</u> | <u>FGHHSSSWD</u>  |                   |               |
|                   | G                 | QOGSGSGQSP        | SRGRHGSGSG        | HSSSYGQHGS        | GSGWSSSSGR        |                   |                   |                   |               |
|                   | G                 | QOGSGSGQSP        | SRGRHGSGSG        | HSSSYGQHGS        | GSGWS             |                   |                   |                   |               |
|                   |                   | SGSGQSP           | SRGRHGSGSG        | HSSSYGQHGS        | GSGWSSSSGR        |                   |                   |                   |               |
|                   |                   | SGSGQSP           | SRGRHGSGSG        | HSSSYGQHGS        | GSGWSS            |                   |                   |                   |               |
|                   |                   | SP                | SRGRHGSGSG        | HSSSYGQHGS        | GSGWS             |                   |                   |                   |               |
|                   |                   |                   | RGRHGSGSG         | HSSSYGQHGS        | GSGW              |                   |                   |                   |               |
|                   |                   |                   | GRHGSGSG          | HSSSYGQHGS        | GSGWSSSSGR        | HGSGSGQSSG        | FGHHE             |                   |               |
|                   |                   |                   | GRHGSGSG          | HSSSYGQHGS        | GSGWSSSSGR        | HGSGSGQSSG        | FGHHE             |                   |               |
|                   |                   |                   | GRHGSGSG          | HSSSYGQHGS        | GSGWSSSSGR        | HG                |                   |                   |               |
|                   |                   |                   | GRHGSGSG          | HSSSYGQHGS        | GSGWSSSSGR        |                   |                   |                   |               |
|                   |                   |                   | GRHGSGSG          | HSSSYGQHGS        | GSGWS             |                   |                   |                   |               |
|                   |                   |                   | GRHGSGSG          | HSSSYGQHGS        | GSGW              |                   |                   |                   |               |
|                   |                   |                   | HGSGSG            | HSSSYGQHGS        | GSGWSSSSGR        | HGSGSGQSSG        | FGHHESS           |                   |               |
|                   |                   |                   | HGSGSG            | HSSSYGQHGS        | GSGWSSSSGR        | HGSGSGQSSG        | FGHHE             |                   |               |
|                   |                   |                   | HGSGSG            | HSSSYGQHGS        | GSGWSSSSGR        | HGSGSGQSSG        | FGHHE             |                   |               |
|                   |                   |                   | HGSGSG            | HSSSYGQHGS        | GSGW              |                   |                   |                   |               |
|                   |                   |                   |                   | QHGGS             | GSGWSSSSGR        | HGSGSGQSSG        | FGHHESS           |                   |               |
|                   |                   |                   |                   | QHGGS             | GSGWSSSSGR        | HGSGSGQSSG        | FGHHE             |                   |               |
|                   |                   |                   |                   | QHGGS             | GSGWSSSSGR        | HGSGSGQSSG        | FGHHE             |                   |               |
|                   |                   |                   |                   | QHGGS             | GSGWSSSSGR        | HGSGSGQSSG        | FGHHE             |                   |               |
|                   |                   |                   |                   | GS                | GSGWSSSSGR        | HGSGSGQSSG        | FGHHE             |                   |               |
|                   |                   |                   |                   |                   | SSSSGR            | HGSGSGQSSG        | FGHHESSWQ         |                   |               |
|                   |                   |                   |                   |                   | SSSSGR            | HGSGSGQSSG        | FGHHESSW          |                   |               |
|                   |                   |                   |                   |                   | SGR               | HGSGSGQSSG        | FGHHESSW          |                   |               |
|                   |                   |                   |                   |                   | GR                | HGSGSGQSSG        | FGHHESSWQ         |                   |               |
|                   |                   |                   |                   |                   |                   | HGSGSGQSSG        | FGHHESSW          |                   |               |
| 1890              | 1900              | 1910              | 1920              | 1930              | 1940              | 1950              | 1960              | 1970              |               |
| <u>SSGYDQHGSG</u> | <u>SGHSSSYDQH</u> | <u>GRSRGSSRG</u>  | <u>EDHGSSSGS</u>  | <u>SSYGQHGSGS</u> | <u>ROSLGHGQHG</u> | <u>SGSGQSPSPS</u> | <u>RGRHGSGSGQ</u> | <u>SSSYGPGSG</u>  |               |
|                   |                   |                   | HGSSSGSS          | SSYGQHGSGS        | ROSLGHGQHG        | SGSGQSPSPS        |                   |                   |               |
|                   |                   |                   | HGSSSGSS          | SSYGQHGSGS        | RQSL              |                   |                   |                   |               |
|                   |                   |                   |                   |                   | QSLGHGQHG         | SGSGQSPSPS        | RGRHGSGSGQ        | SSSY              |               |
|                   |                   |                   |                   |                   | GHGQHG            | SGSGQSPSPS        | RGRHGSGSGQ        | SSSYGPY           |               |
|                   |                   |                   |                   |                   | GHGQHG            | SGSGQSPSPS        | RGRHGSGSGQ        | SSSYGP            |               |
|                   |                   |                   |                   |                   | HGQHG             | SGSGQSPSPS        | RGRHGSGSGQ        | SSSYGPY           |               |
|                   |                   |                   |                   |                   | HG                | SGSGQSPSPS        | RGRHGSGSGQ        | SSSYGPY           |               |
|                   |                   |                   |                   |                   | G                 | SGSGQSPSPS        | RGRHGSGSGQ        | SSSYGPY           |               |
|                   |                   |                   |                   |                   |                   | SGSGQSPSPS        | RGRHGSGSGQ        | SSSYGPY           |               |
|                   |                   |                   |                   |                   |                   | SGSGQSPSPS        | RGRHGSGSGQ        | SSSYGP            |               |
| 1980              | 1990              | 2000              | 2010              | 2020              |                   |                   |                   |                   |               |
| <u>SGWSSSRGPY</u> | <u>ESGSGHSSGL</u> | <u>GHRESRSGQS</u> | <u>SGYGQHGSSS</u> | <u>GHSSTHGQHG</u> |                   |                   |                   |                   |               |
|                   | RGPY              | ESGSGHSSGL        | GHRESR            |                   |                   |                   |                   |                   |               |
|                   |                   | ESGSGHSSGL        | GHRESRSGQS        | SGYGQHGSSS        | GHSSTHGQHG        |                   |                   |                   |               |
| 2220              | 2230              | 2240              |                   |                   |                   |                   |                   |                   |               |
| <u>RGPYESRSGH</u> | <u>SSVFGQHESG</u> | <u>SGHSSAYSCH</u> |                   |                   |                   |                   |                   |                   |               |
|                   | ESRSGH            | SSVFGQHESG        | SGHSSAY           |                   |                   |                   |                   |                   |               |
|                   | ESRSGH            | SSVFGQHESG        | SGHSSA            |                   |                   |                   |                   |                   |               |
|                   | ESRSGH            | SSVFGQHESG        | SGHS              |                   |                   |                   |                   |                   |               |
|                   | ESRSGH            | SSVFGQHESG        | SGH               |                   |                   |                   |                   |                   |               |
|                   | SGH               | SSVFGQHESG        | SGHSSAY           |                   |                   |                   |                   |                   |               |
|                   | SGH               | SSVFGQHESG        | SGHSSA            |                   |                   |                   |                   |                   |               |



## Supplementary Figure 2

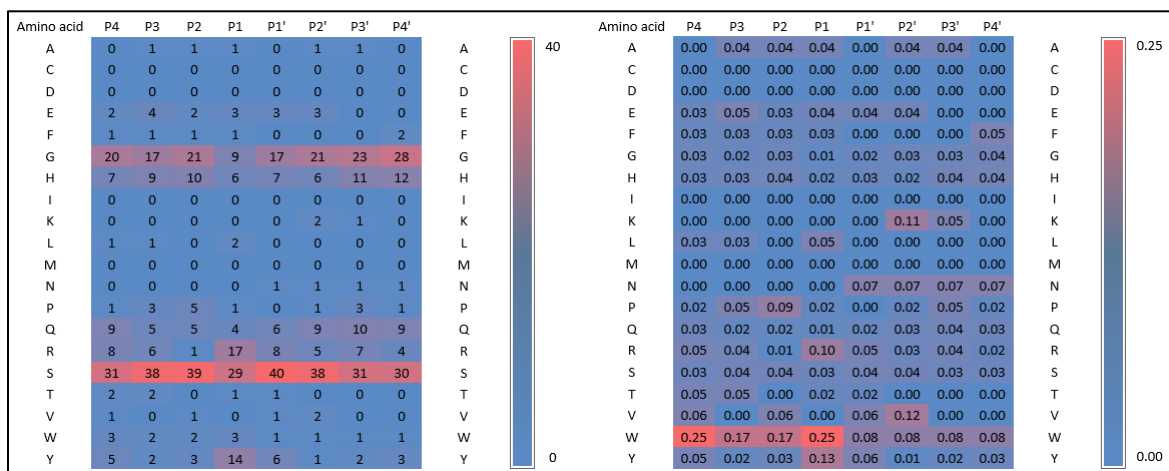

**Supplementary Figure 2 | Analysis of the sequences surrounding the cleavage sites (P1 position) of all HRNR-peptides identified in stratum corneum.** The heat maps show (left panel) the number of residues identified in position P4-P1 and P1'-P4', respectively, and (right panel) the values of these residues normalized vs. the total number of the particular amino acid in the HRNR canonical sequence. Annotation of P4-P1 and P1'-P4' according to ref.<sup>93</sup>.

## Supplementary Figure 3

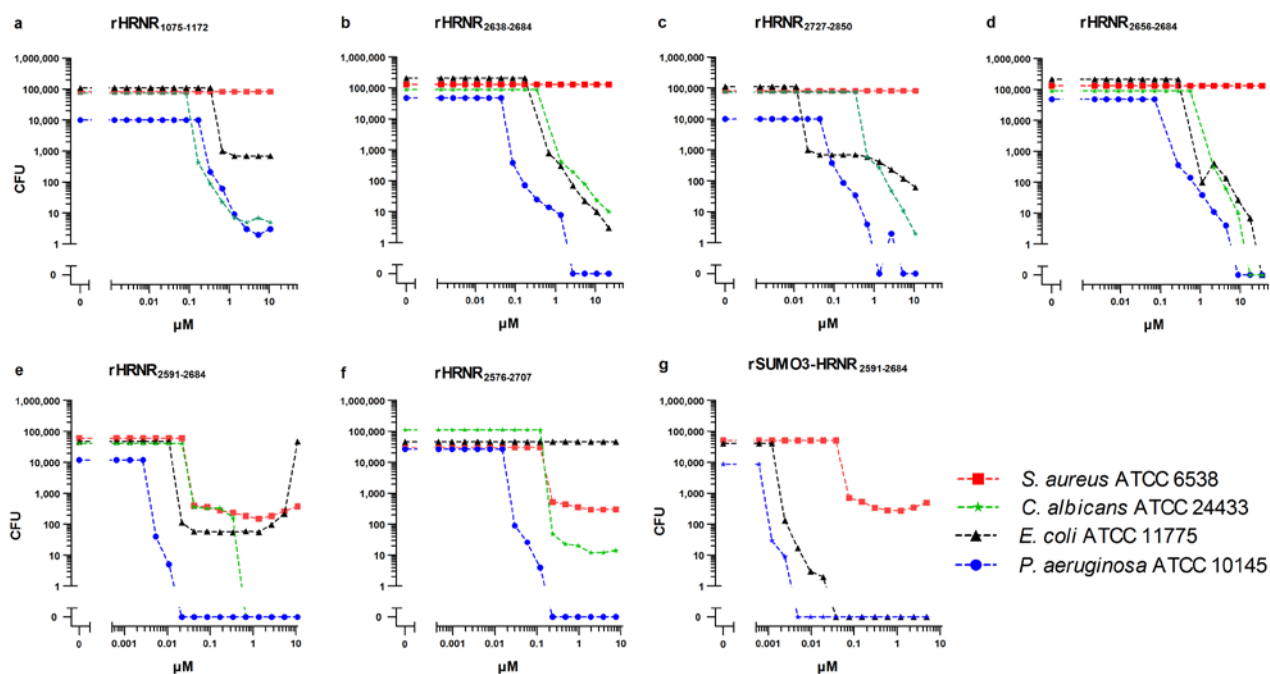

**Supplementary Figure 3 | HRNR fragments are potent broad-spectrum antimicrobial polypeptides.** Sensitivity of *P. aeruginosa* ATCC 10145, *E. coli* ATCC 11775, *S. aureus* ATCC 6538 and *C. albicans* ATCC 24433 towards **a**, rHRNR<sub>1075-1172</sub>; **b**, rHRNR<sub>2638-2684</sub>; **c**, rHRNR<sub>2727-2850</sub>; **d**, rHRNR<sub>2656-2684</sub>; **e**, rHRNR<sub>2591-2684</sub>; **f**, rHRNR<sub>2576-2707</sub>; and **g**, rSUMO3-HRNR<sub>2591-2684</sub> has been tested in a CFU assay system at pH 5.5 in 10 mM NaP/1% TSB (**a-d**) or in 10 mM NaP/0.25% glucose (**e-g**). Note *E. coli* ATCC 11775 missing sensitivity towards rHRNR<sub>2576-2707</sub> at these conditions (**f**), and an “antibiotic paradox” (decrease of sensitivity at increasing peptide concentrations) towards rHRNR<sub>2591-2684</sub> (**e**). AA-sequences of the HRNR-polypeptides are shown in (Supplementary Table 1). Results shown are representatives (n=2) (**a-d, f, g**) and (n=3) (**e**).

Supplementary Figure 4

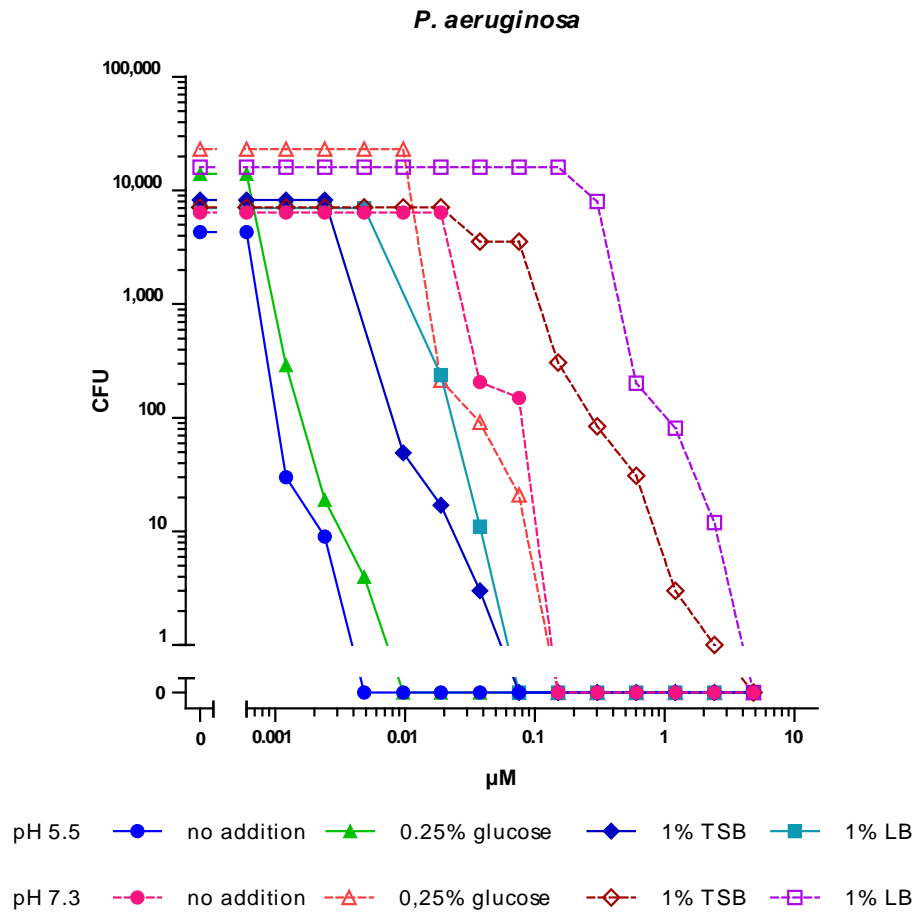

**Supplementary Figure 4 | *P. aeruginosa*-cidal activity of SUMO3-HRNR<sub>2591-2684</sub> is pH-dependent and is inhibited by “Tryptic Soybean Broth, TSB” and “Luria Broth, LB”.**

Recombinant SUMO3-HRNR<sub>2591-2684</sub> was tested at the indicated conditions in 10 mM NaP/0.25% glucose or 1% TSB, 1% LB or no addition. Note a shift of the dose-response curve by both, increased pH and addition of nutrients like TSB or LB. All data shown are representatives (n=2).



Supplementary Figure 5:

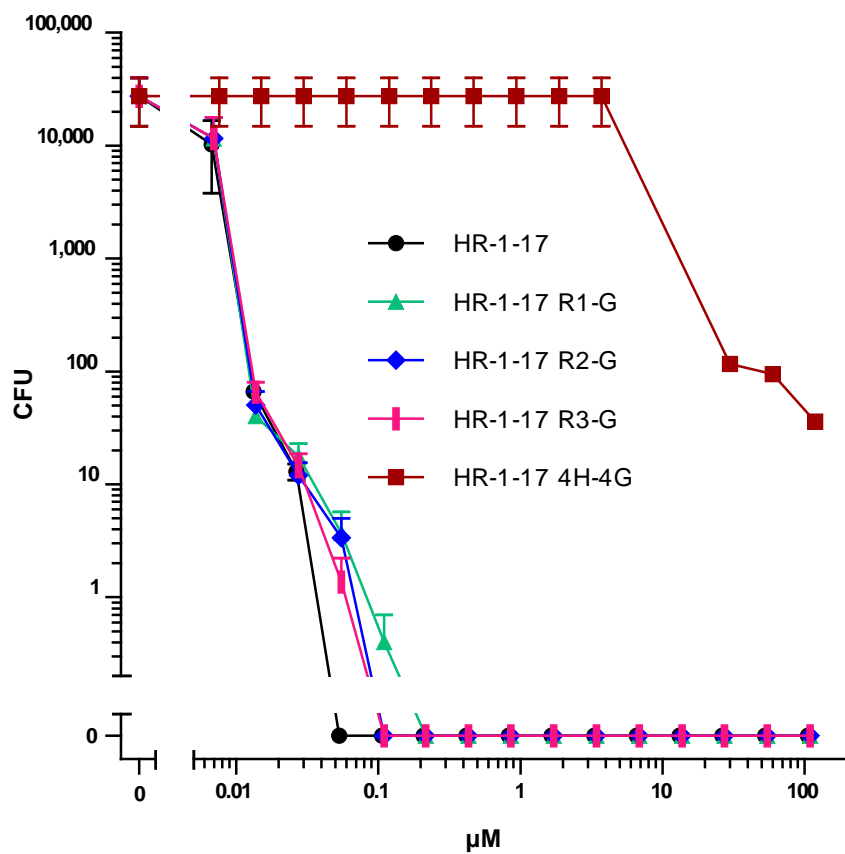

Supplementary Figure 5 | *P. aeruginosa* ATCC 10145-cidal activity of HR 1-17 mutants.

*Pseudomonas aeruginosa* ATCC 10145-cidal activity in 10 mM NaP/0.25% glucose/pH 5.5, was examined for four mutants of HR1-17 with replacement of either Arg or His by Gly (AA-sequences are shown in Supplementary Table 4). Data represent the mean  $\pm$  s.e.m. (n=3).

Supplementary Figure 6:

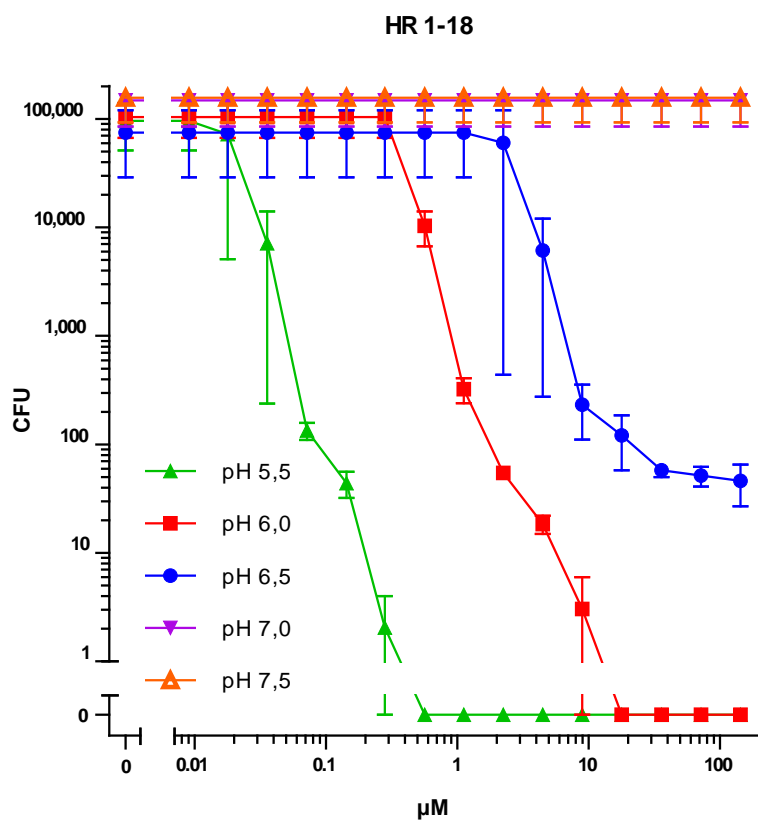

**Supplementary Figure 6 | *P. aeruginosa*-cidal activity of HR1-18 depends on pH.** *P. aeruginosa* ATCC 10145-cidal activity of HR1-18 was examined in 10 mM NaP/ 0.25% glucose/pH 5.5-7.5. Data shown represent the mean  $\pm$  s.e.m. (n=3).

Supplementary Figure 7:

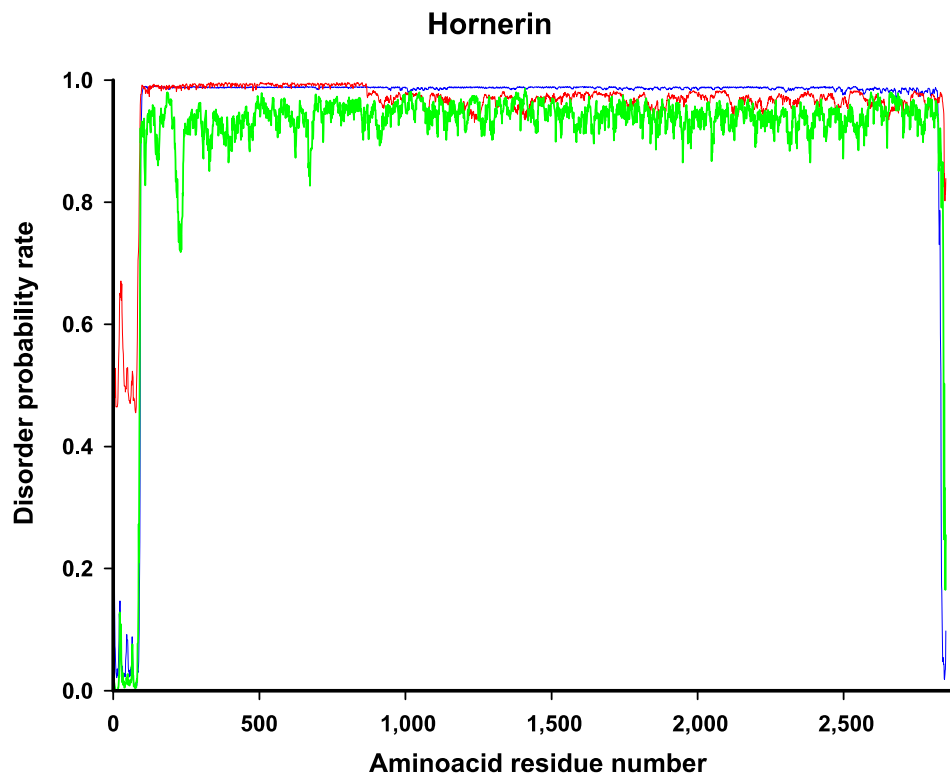

**Supplementary Figure 7 | Evaluation of the intrinsic disorder predisposition in HRNR by three computational tools.** The amino acid position (abscissa) is shown as a function of the disorder probability rate. Results of the PreDisorder program<sup>94</sup> are given in blue, of the DisoClust program<sup>95</sup> given in red and results of the DISOPRED2 program<sup>96</sup> appear in green. There is a clear difference between the N-terminal ordered EF-hand-like-domain (AA 1-100), the area of repetitive Gly/Ser-rich units detected as a large intrinsically disordered region and the small C-terminal ordered region.

### Supplementary Figure 8:

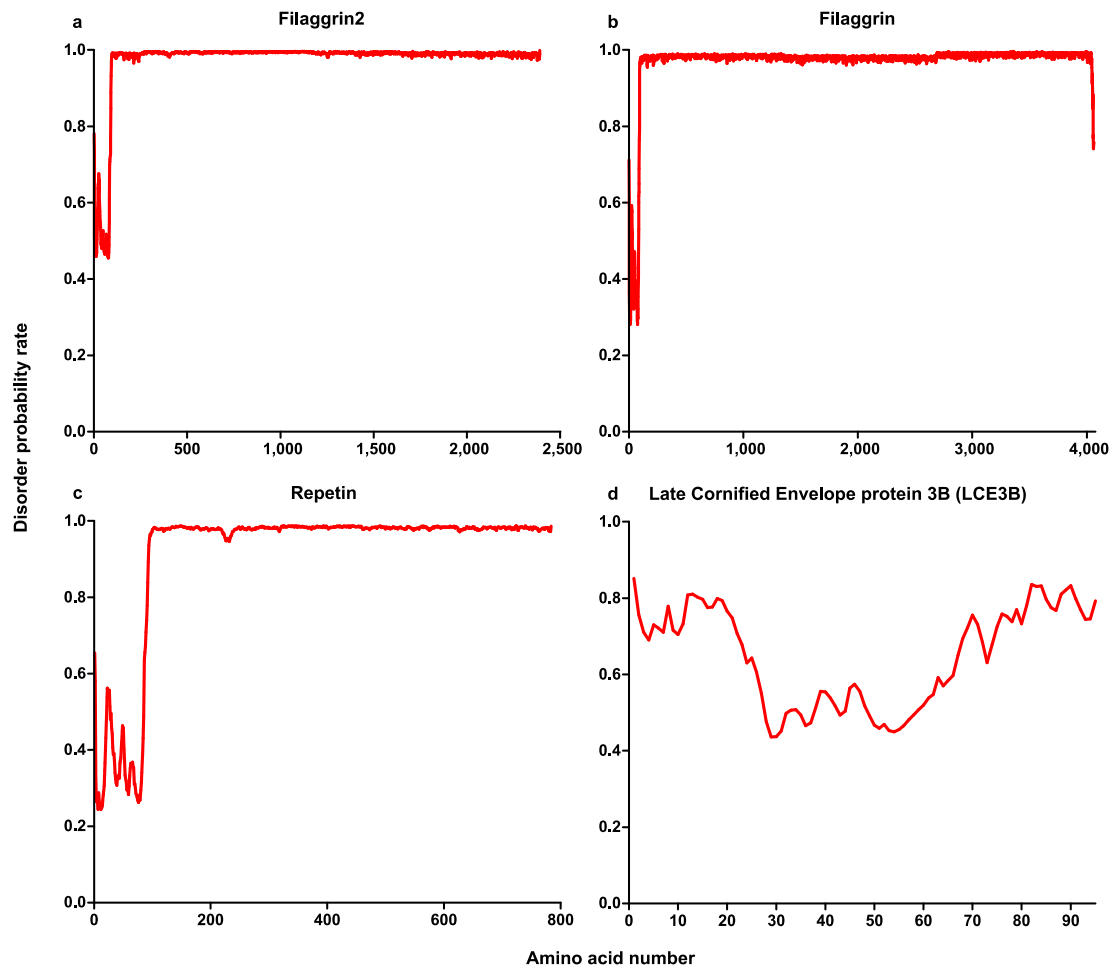

**Supplementary Figure 8 | Evaluation of the intrinsic disorder predisposition FLG-2, FLG, RPT and LCE3B by the DisoClust program. a: FLG-2; b: FLG; c: RPT; d: LCE3B.** The amino acid position (abscissa) is shown as a function of the disorder probability rate. Results of the DisoClust program<sup>95</sup> are given. In the three “S100-fused-type-proteins FLG2, FLG and RPT there is a clear difference between the N-terminal ordered EF-hand-like-domain (AA 1-100) and the area rich in repetitive disorder promoting AA. LCE3B reveals, possibly due to its high content of Cys and His, a disorder probability between 50 - 70 % in the relevant stretch of AA 56 to AA 78 in LCE3B<sub>56-68</sub>. Notably, this peptide is investigated for antimicrobial activity in its thiol-form at pH 5.5, where His is protonated. This is not taken into account by the DisoClust program and may further increase the disorder probability rate.

Supplementary Figure 9:

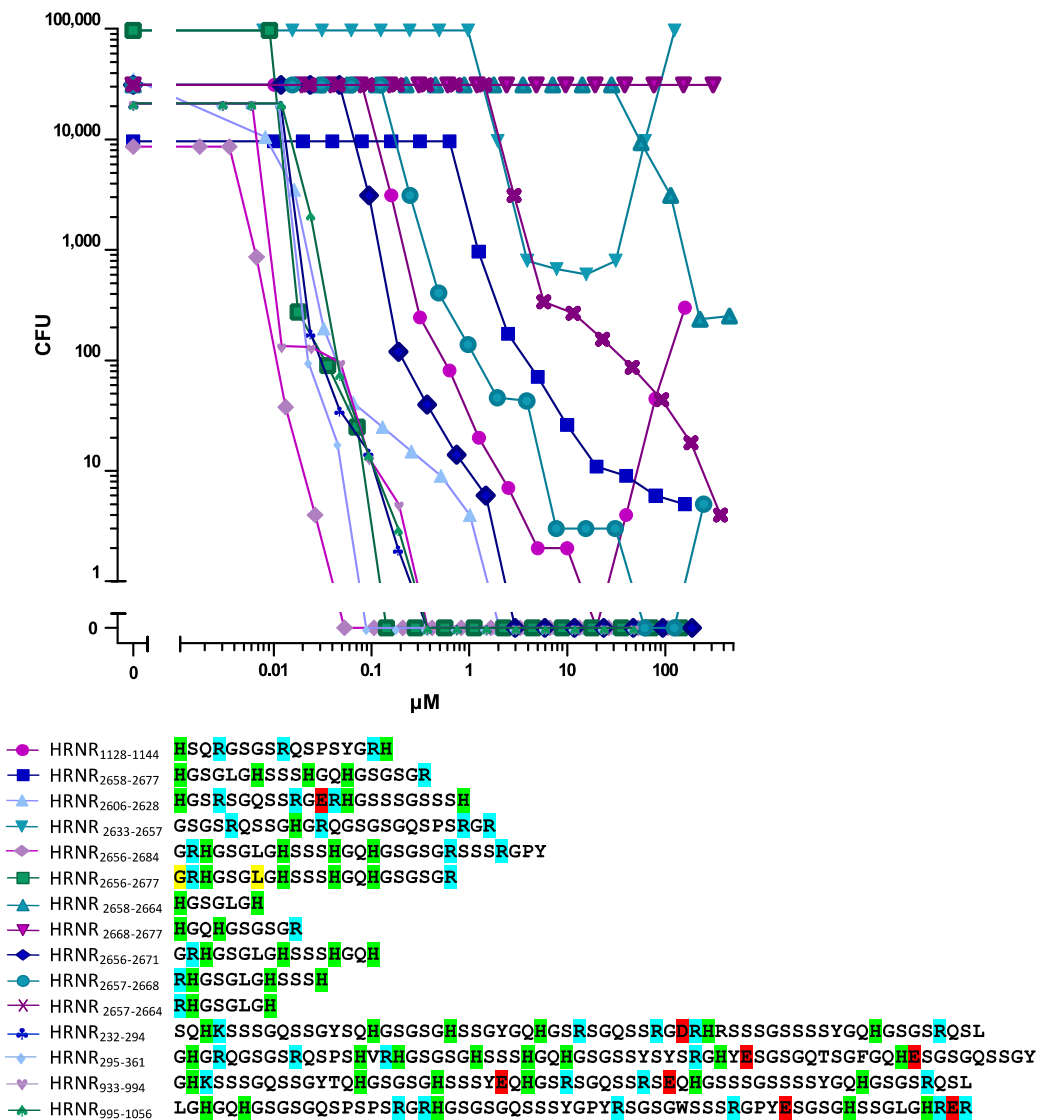

Supplementary Figure 9 | *P. aeruginosa*-cidal activity of selected HRNR peptides. Sensitivity of *P. aeruginosa* ATCC 10145 towards various peptides was tested in 10 mM NaP/0.25% glucose/pH 5.5. In the peptide's amino acid sequences residues cationic at pH 7, cationic only at pH 5.5 and anionic at pH 5.5 are colored blue, green and red, respectively. Antimicrobial paradox<sup>16</sup> (increased bacterial growth with increasing CIDAMP-concentrations) was observed for HRNR<sub>1128-1144</sub> and HRNR<sub>2633-2657</sub>. Representative dose-response curves of selected HRNR-peptides are shown (for the number of experiments see Supplementary Table 6).

Supplementary Figure 10:

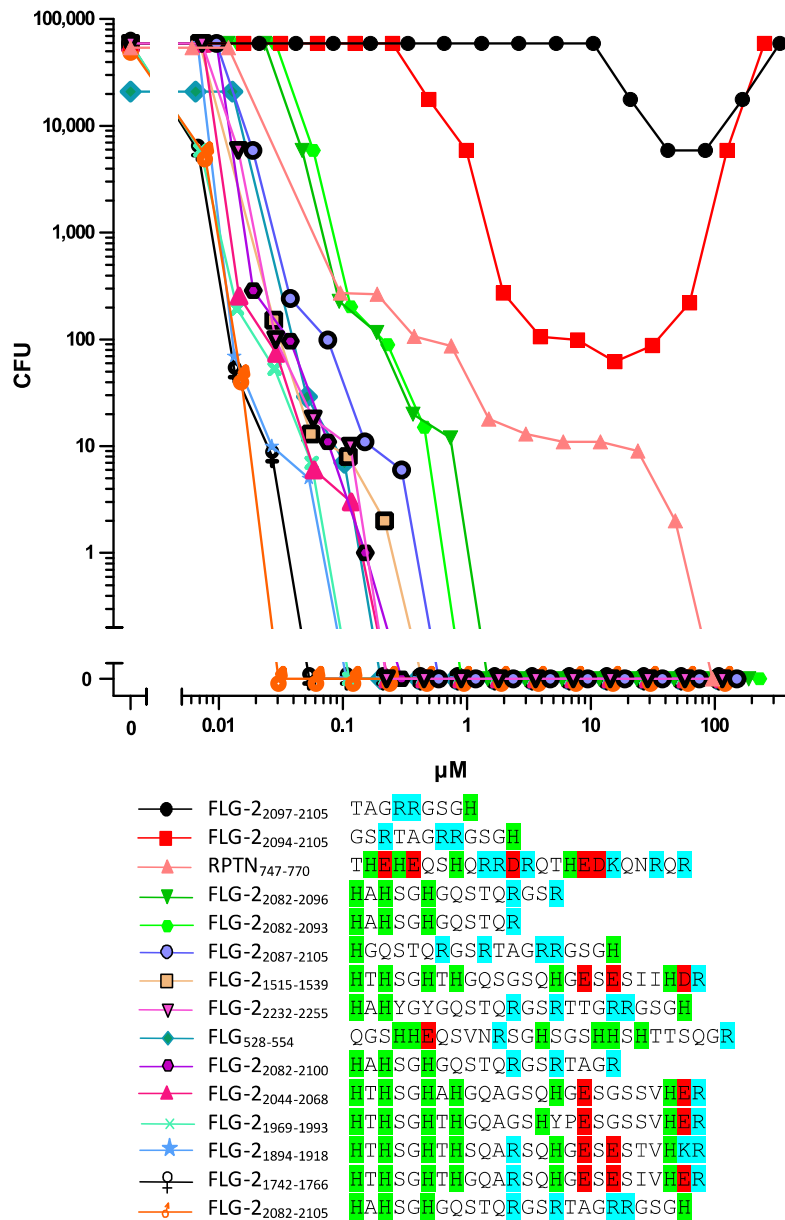

**Supplementary Figure 10 | *P. aeruginosa*-cidal activity of selected FLG-2-, FLG- and RPTN-derived CIDAMPs.** Sensitivity of *P. aeruginosa* ATCC 10145 was tested in 10 mM NaP/ 0.25% glucose/pH 5.5. Residues cationic at pH 7 (R, K), cationic only at acidic pH (H) and anionic (E, D) are colored blue, green and red, respectively. Antimicrobial paradox<sup>16</sup> (increased bacterial growth with increasing CIDAMP-concentrations) was observed for FLG-2<sub>2094-2105</sub> and FLG-2<sub>2097-2105</sub>. Representative dose-response curves of selected FLG-2-; FLG- and RPTN-peptides are shown (for the number of experiments see Supplementary Table 7).



**Supplementary Figure 12:**

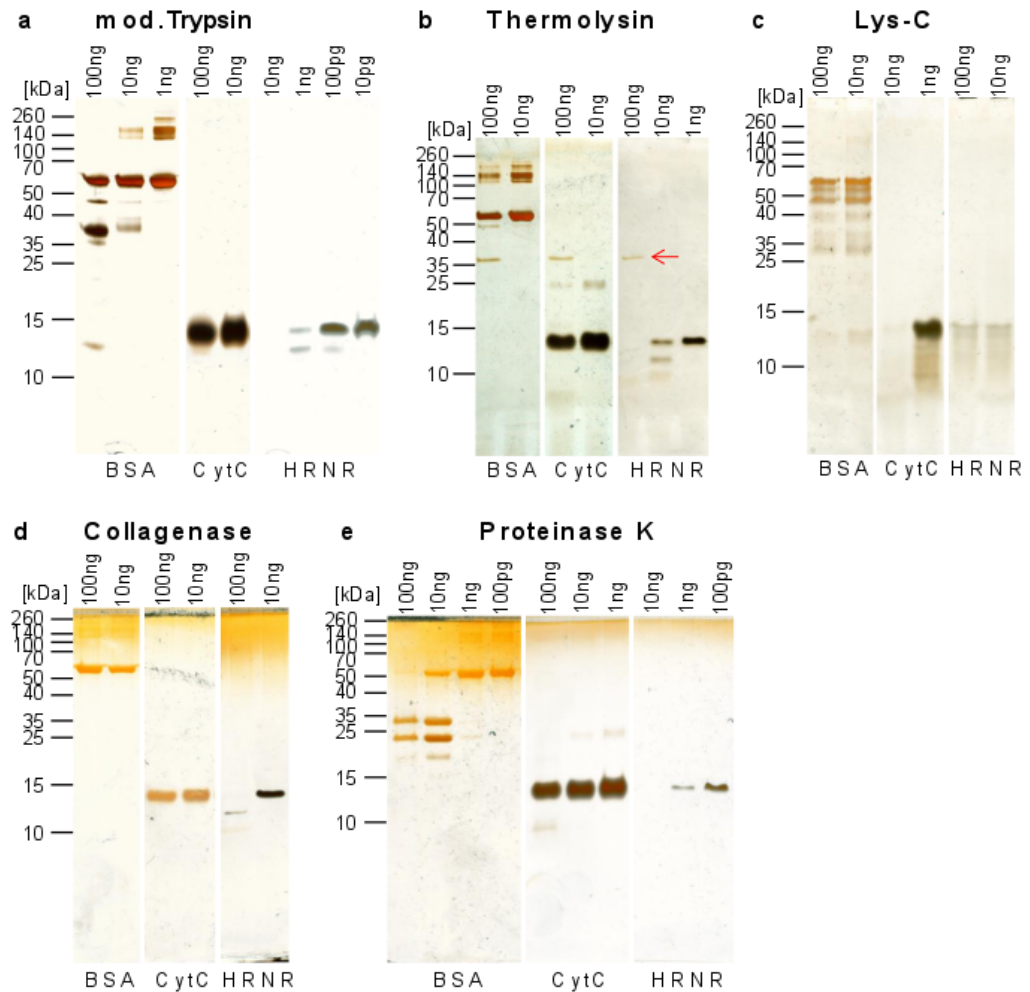

**Supplementary Figure 12 | Protease sensitivity of rHRNR<sub>2591-2684</sub>, BSA and cytochrome C.**

1 µg each of bovine serum albumin (BSA), cytochrome (Cyt) C or rHRNR<sub>2591-2684</sub> (HRNR, a different HRNR-fragment as used in Fig. 8) were incubated with the proteases indicated above in protease-specific buffers for 1 h at 37 °C. Thereafter samples were subjected to a SDS-PAGE analysis and proteins were detected by silver staining. **a**, modified (methylated) serine proteinase trypsin; **b**, the metalloproteinase thermolysin (red arrow); **c**, the serine proteinase Lys C; **d**, the metalloproteinase collagenase; and **e**, proteinase K. Note the sensitivity of rHRNR<sub>2591-2684</sub> towards digestion by Lys C and collagenase, albeit higher concentrations, although predicted cleavage sites for these enzymes are absent in rHRNR<sub>2591-2684</sub> (for AA-sequence see Supplementary Table 1). Data shown are representatives (n=3).



### Supplementary Figure 13:

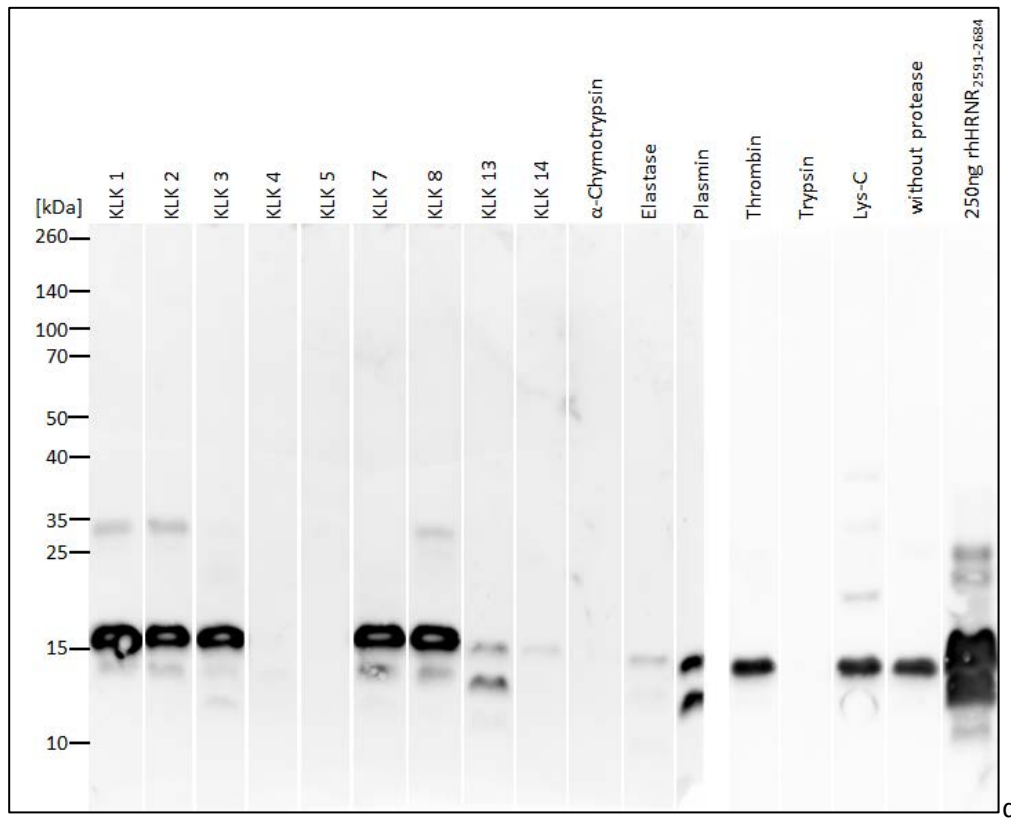

**Supplementary Figure 13 | KLK4, KLK5, KLK13, KLK14 and trypsin, but not KLK1, KLK7, KLK8 and LysC digest rHRNR<sub>2591-2684</sub>.** 500 ng rHRNR<sub>2591-2684</sub> each were incubated with 0.7 nM of the respective, activity-checked protease in buffer (100 mM Tris, pH 7.5, 150 mM NaCl, 5 mM EDTA, 0.05 Tween 20) for 15 h. For SDS-PAGE analyses 250 ng of rHRNR<sub>2591-2684</sub> were used and then analyzed by rHRNR<sub>2591-2684</sub>-Westernblot. Lane 16 (“without protease”) contains a control sample treated in the same manner, however in the absence of a protease. In lane 17, 250 ng of an rHRNR<sub>2591-2684</sub>-pool (for AA-sequence see Supplementary Table 1) have been directly applied. Note the presence of multiple bands, which originate from oligomeric HRNR-complexes<sup>12</sup>. Data shown are representatives (n=3).

### Supplementary Figure 14:

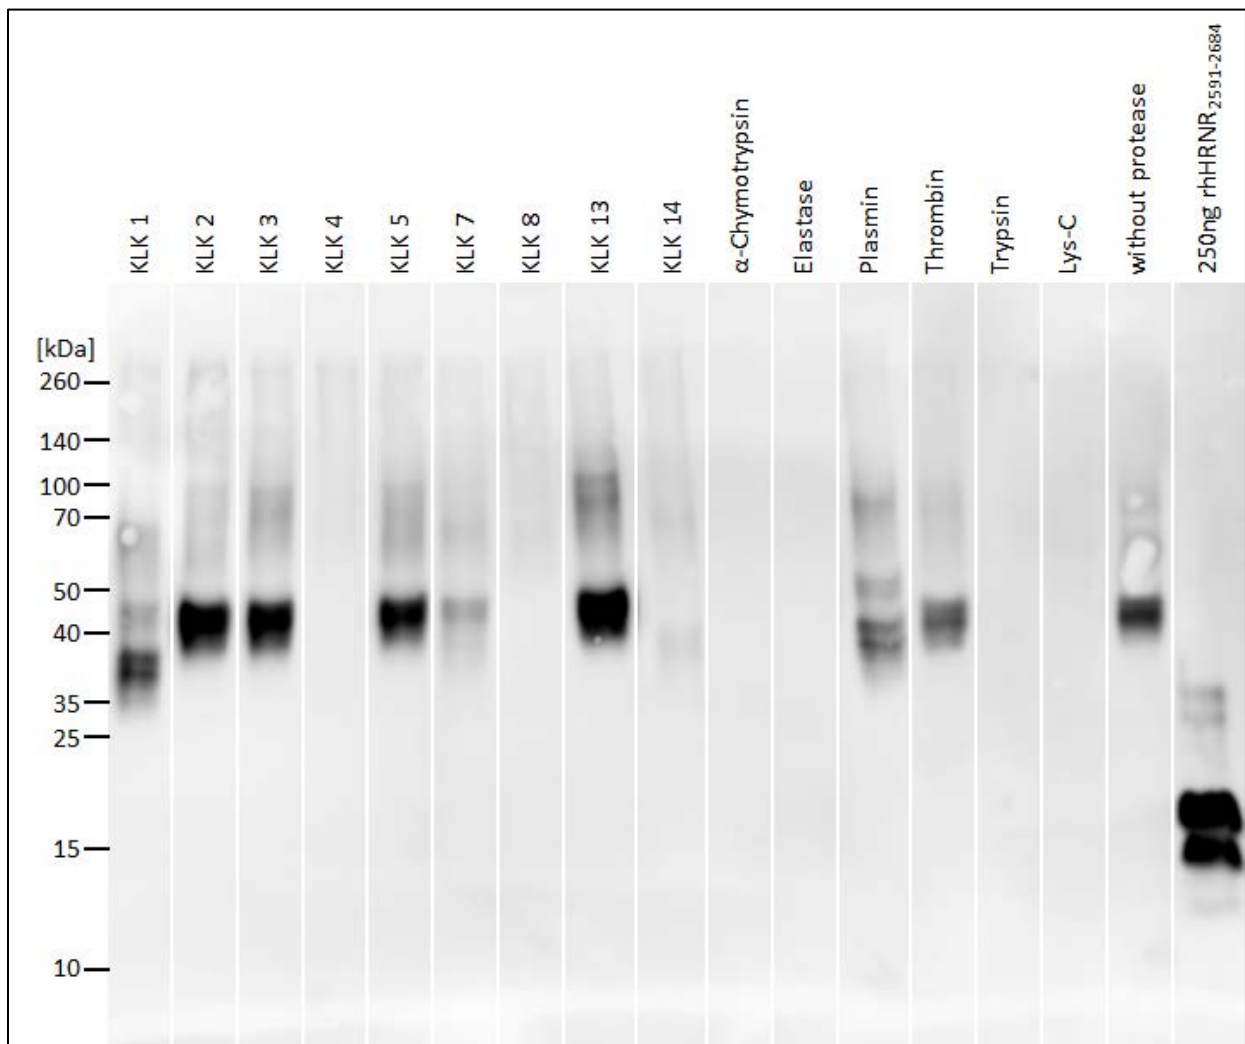

**Supplementary Figure 14 | KLK1, KLK4, KLK7, KLK8, KLK14, trypsin and LysC, but not KLK13 digest PAD1-deiminated rHRNR<sub>2591-2684</sub>.** 500 ng PAD1-deiminated rHRNR<sub>2591-2684</sub> each were incubated for 15 h with 0.7 nM of the respective, activity-tested protease in buffer (100 mM Tris pH 7.5, 150 mM NaCl, 5 mM EDTA, 0.05% Tween 20). For SDS-PAGE analyses 250 ng of the protein were used and then analyzed by rHRNR<sub>2591-2684</sub>-Westernblot. Lane 16 ("without protease") contains a control sample (PAD1-deiminated rHRNR<sub>2591-2684</sub>), treated in the same manner, however in the absence of a protease. In lane 17, 250 ng of an rHRNR<sub>2591-2684</sub>-pool have been directly applied. Note a marked decrease of PAD1-deiminated rHRNR<sub>2591-2684</sub> electromobility (lane 16) relative to rHRNR<sub>2591-2684</sub> (lane 17). Data shown are representatives (n=3).

Supplementary Figure 15:

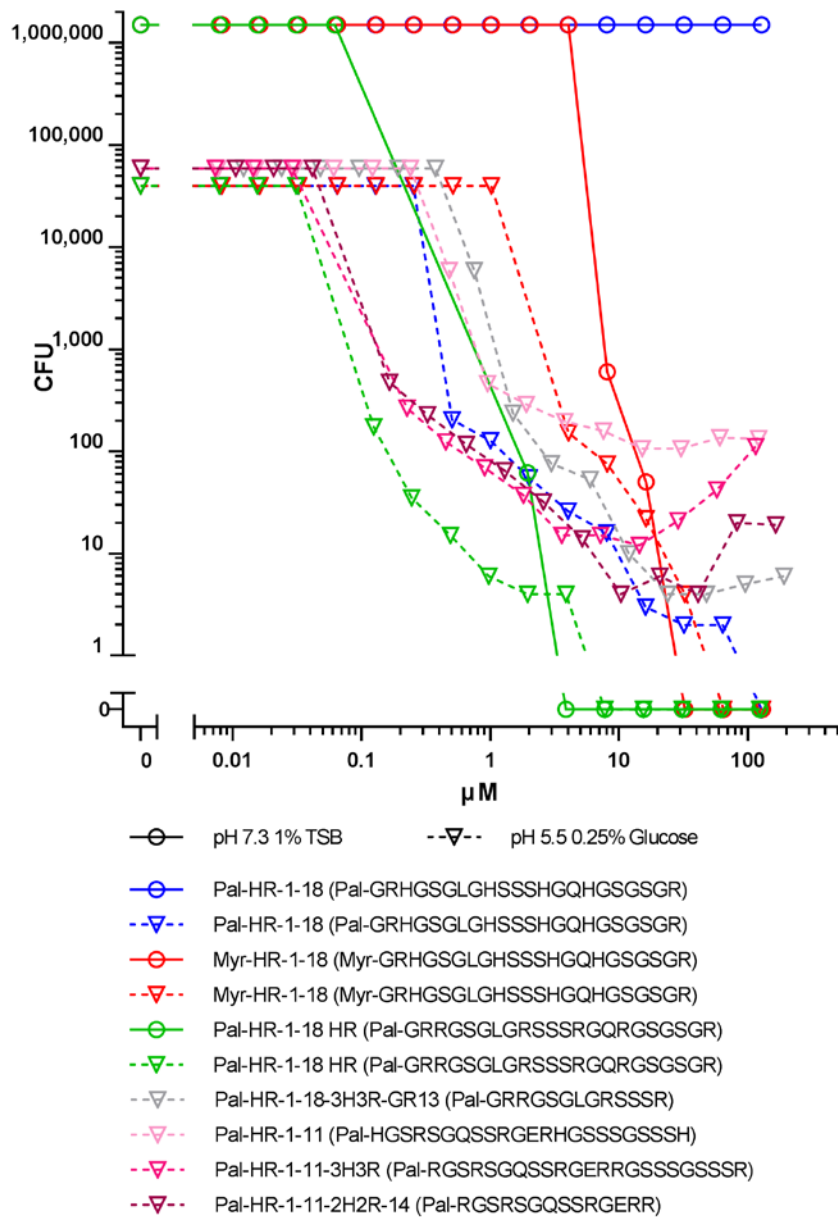

**Supplementary Figure 15 | Palmitoylation and myristoylation of CIDAMPs improves *S. aureus*-cidal activity of HR1-18, HR1-11 and its Arg-mutants.** *S. aureus* ATCC 6538-cidal activity, assayed either in 10 mM NaP, pH 5.5, containing 0.25% glucose, or in 10 mM NaP, pH 7.3, containing 1 % TSB, was examined in a CFU assay system. Representatives are shown (for the number of experiments see Table 5).

Supplementary Fig. 16

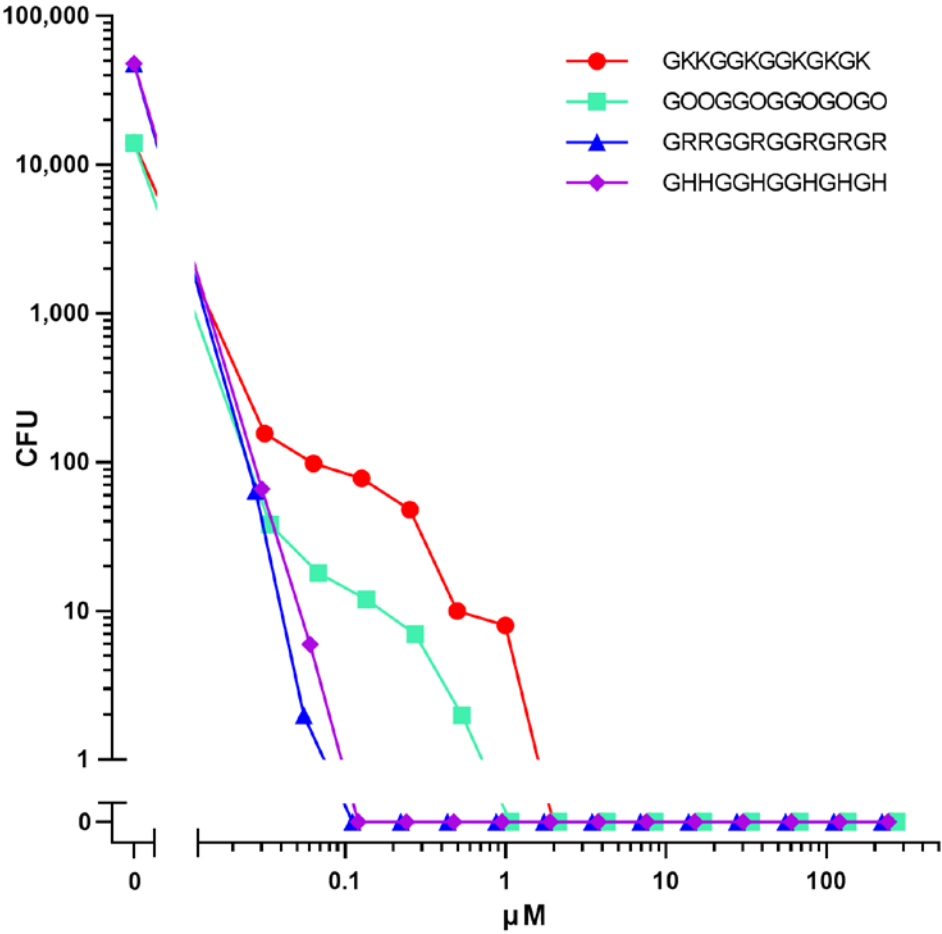

Supplementary Fig. 16 | *P. aeruginosa*-bactericidal activity of Gly-rich 13-mer CIDAMPs containing Lys, Orn, Arg or His. *P. aeruginosa* ATCC 10145-bactericidal activity was examined in a CFU assay system in 10 mM NaP, pH 5.5, containing 0.25% glucose. Data shown are representatives (n = 2).

## Supplementary Figure 17

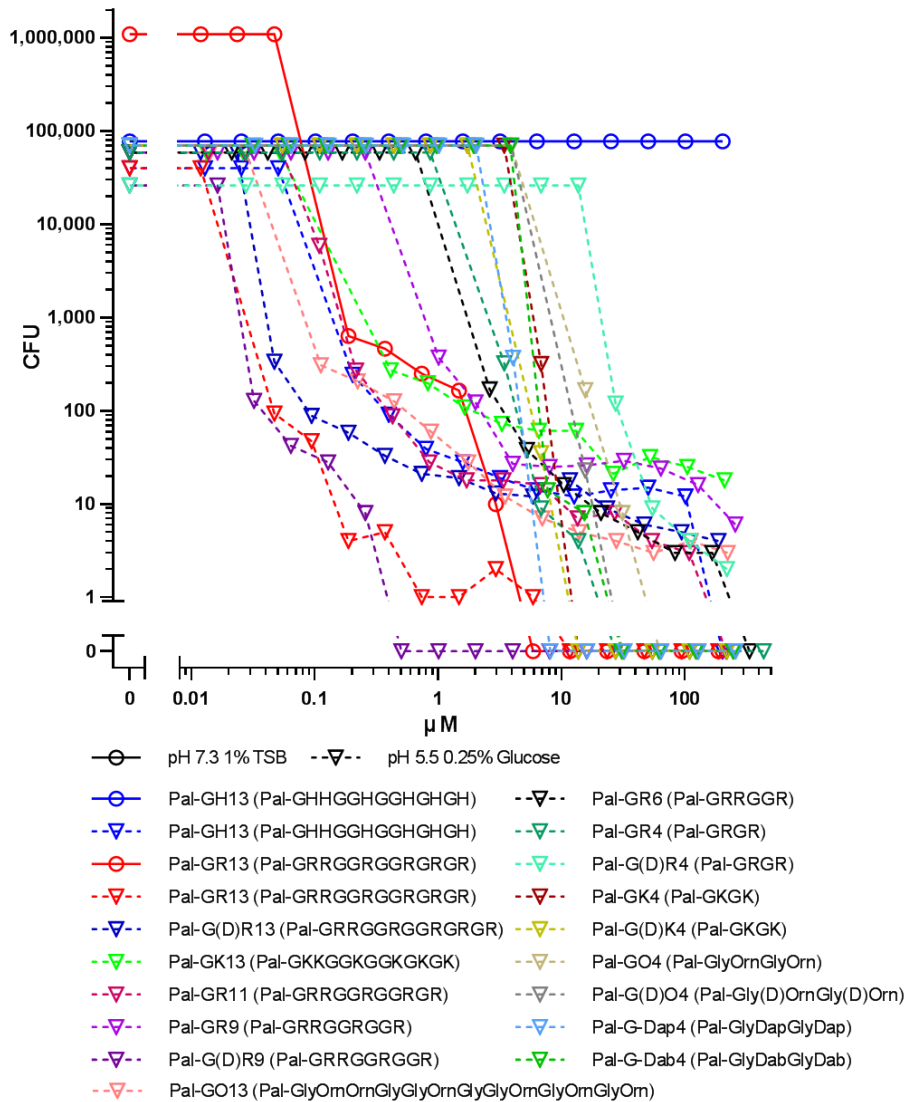

**Supplementary Figure 17 | *S. aureus*-cidal activity of palmitoylated CIDAMPs depends on the peptide chain length and positively charged AAs.** *S. aureus* ATCC 6538-cidal activity of the lipopeptides was analyzed in a CFU assay system, in 10 mM NaP, pH 5.5, containing 0.25% glucose (solid lines), or in 10 mM NaP, pH 7.3, containing 1 % TSB (dashed lines). Note the loss of sensitivity when Pal-GH13 is tested in TSB-containing medium at pH 7.3. Dab: L-2,4-Diaminobutyric acid, Dap:L-2,3-Diaminopropionic acid. Representatives are shown (for the number of experiments see Table 2).

Supplementary Figure 18

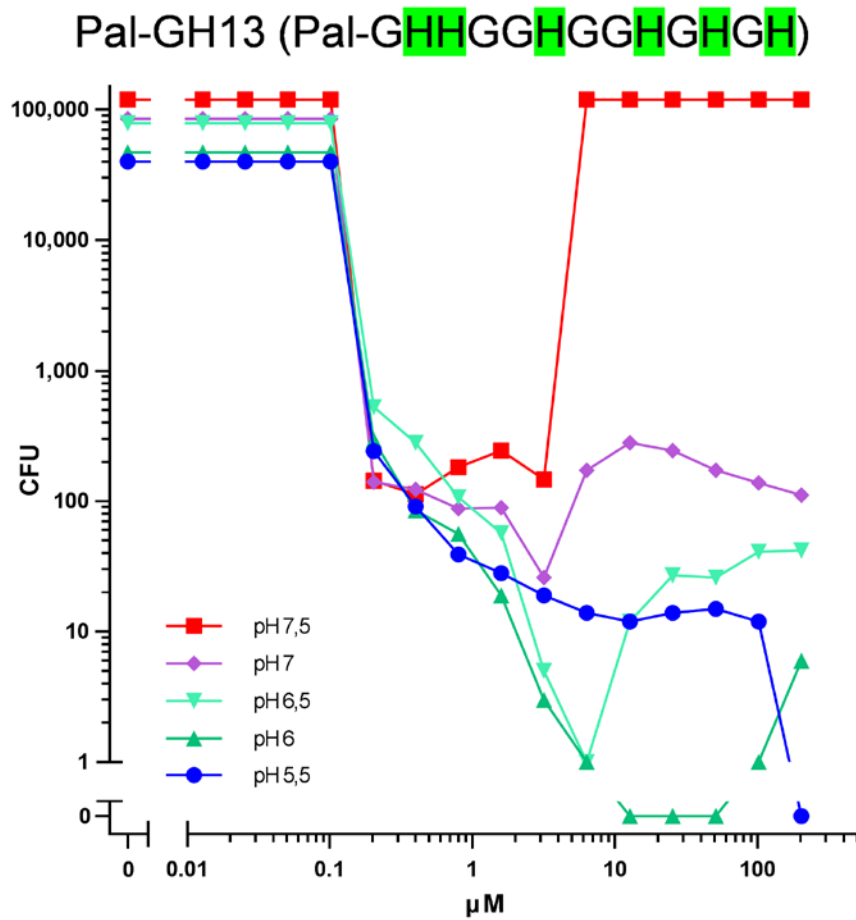

**Supplementary Figure 18 | pH-dependency analysis of Pal-GH13-*S. aureus*-cidal activity reveals an “antibiotic paradox”.** *S. aureus* ATCC 6538-cidal activity of Pal-GH13 was analyzed in a CFU assay system in 10 mM NaP (pH 5.5; 6.0; 6.5; 7.0; 7.5) containing 0.25% glucose. Note that an increase of the pH towards pH 7.5 causes an “antibiotic paradox”<sup>16</sup>, which is characterized by an increase of CFU with increasing lipopeptide concentrations. The result of a single experiment is shown.

Supplementary Figure 19

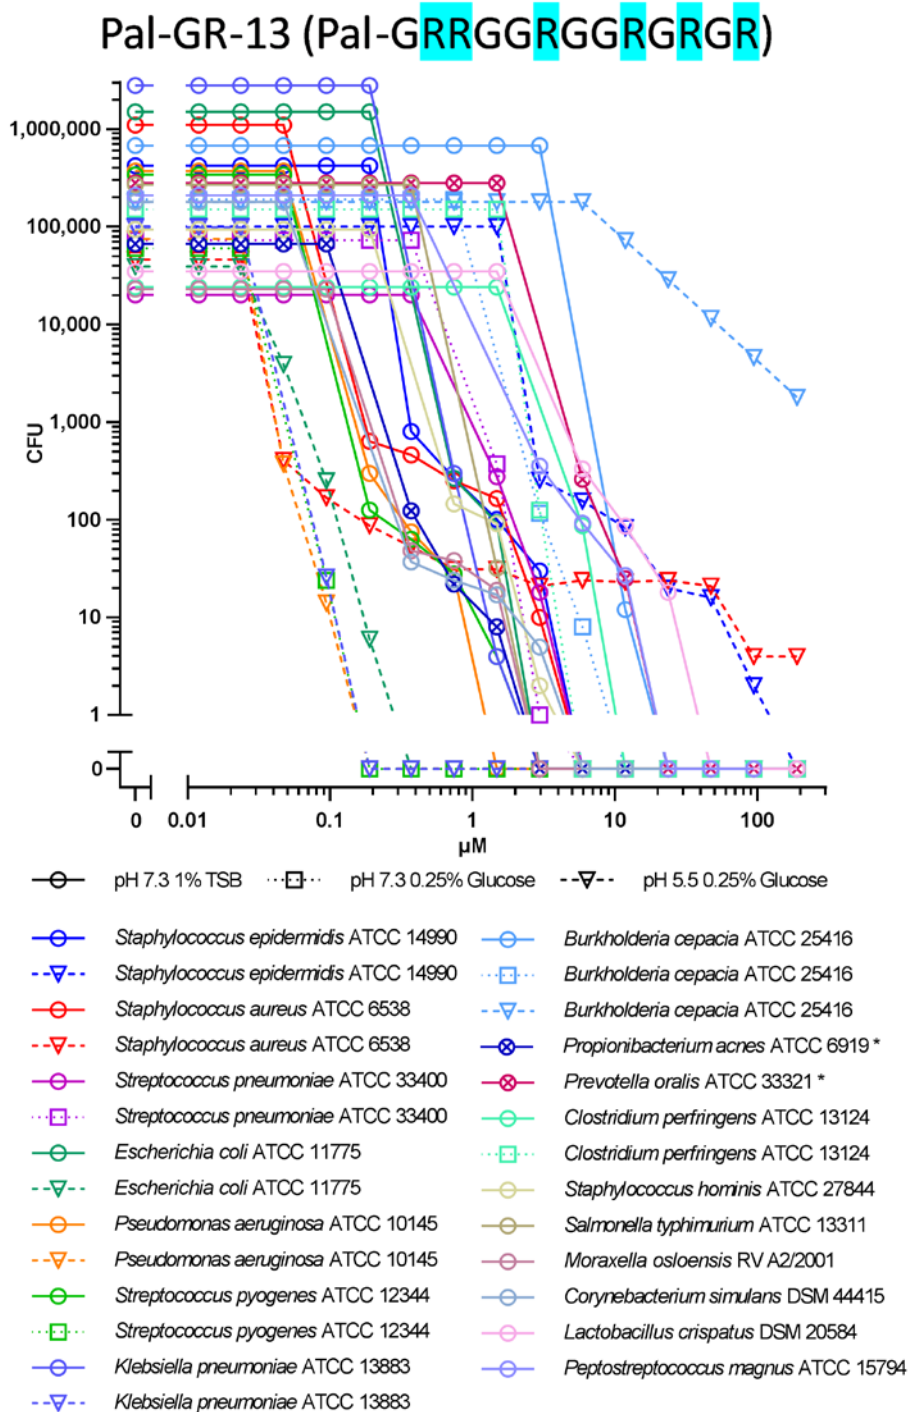

**Supplementary Figure 19: Antimicrobial activity spectrum of Pal-GR13.** Sensitivity of selected bacteria towards Pal-GR13 was tested in a CFU assay system with 10 mM NaP containing either 0.25% glucose or 1% TSB as test medium, at pH 5.5 or pH 7.3. Representatives are shown (for the number of experiments see Table 7).

Supplementary Figure 20

Palmitoyl-LCE-3B<sub>56-68</sub> (Pal-SHHRCRSHRCRR)

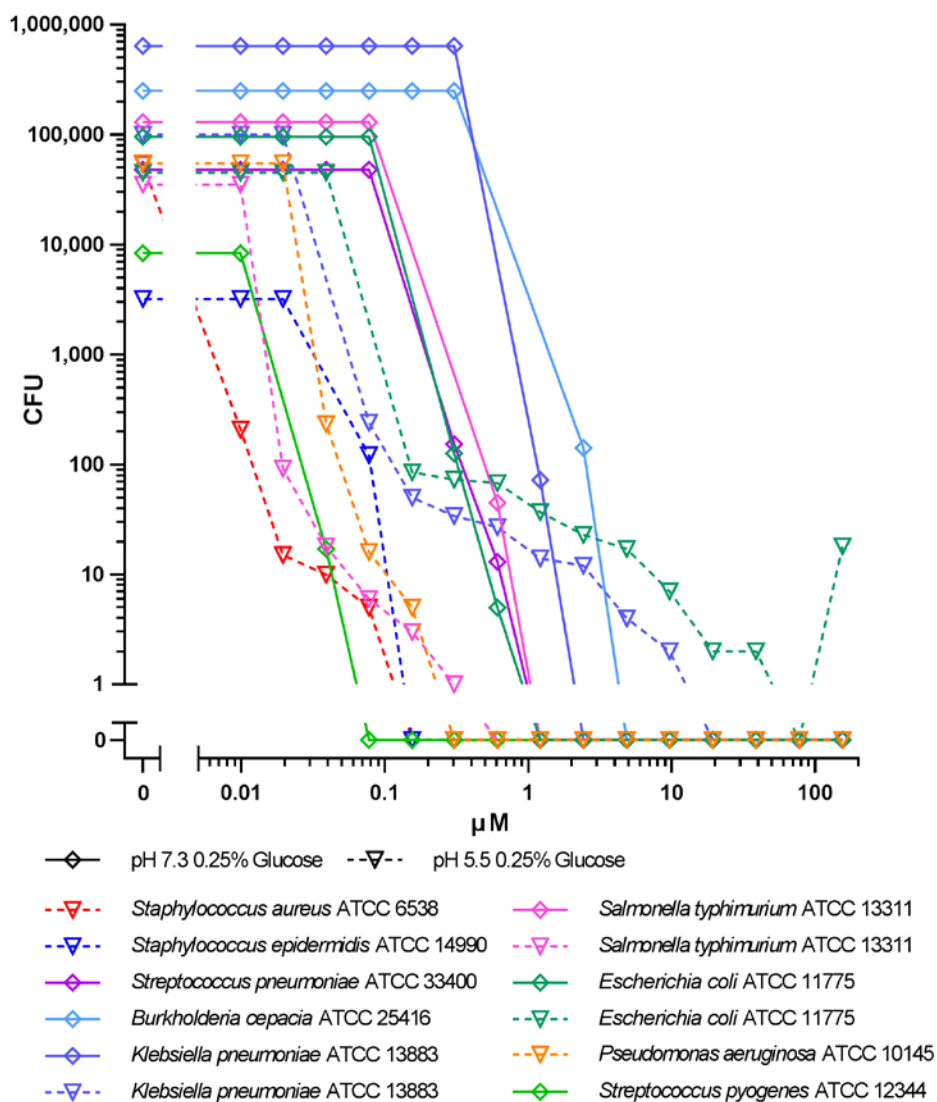

**Supplementary Figure 20: Antimicrobial activity spectrum of Pal-LCE-3B<sub>56-68</sub>.** Sensitivity of bacteria towards Pal-LCE-3B<sub>56-68</sub> was tested in a CFU assay system in 10 mM NaP, containing 0.25% glucose and, depending on the microbe, at pH 5.5, 6.0 or pH 7.3, as indicated in Supplementary Table 7. Representatives are shown (for the number of experiments see Table 8).



### Supplementary Figure 21

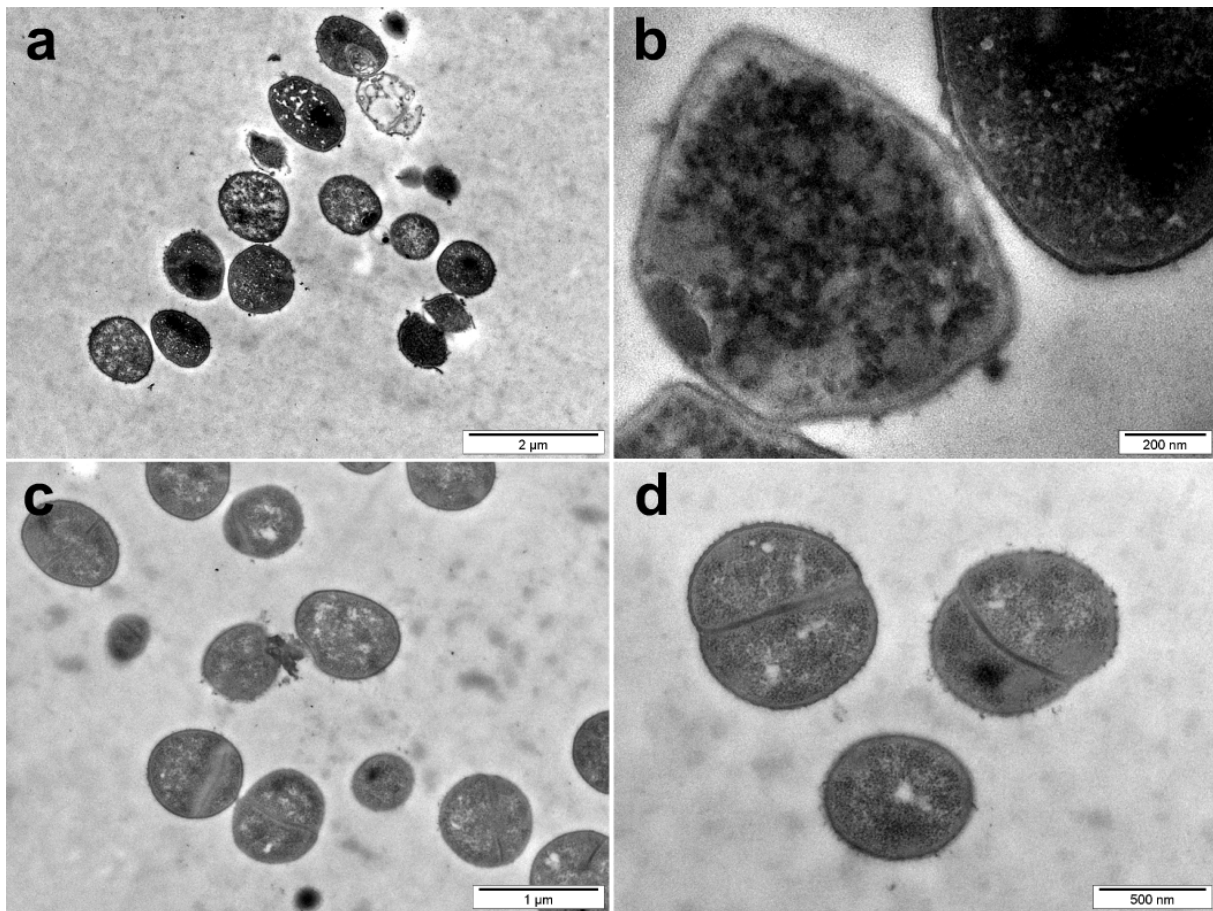

**Supplementary Figure 21| TEM of LCE3B<sub>56-68</sub>-treated *S. aureus*.**  $10^7$  *S. aureus* ATCC 6538, suspended in 150μl 10 mM NaP, pH 5.5, containing 0.25% glucose, were treated with LCE3B<sub>56-68</sub> (SHHRCCRS<sup>SHRCRR</sup>, 125 μg/ml) for 90 min at 37°C and then analyzed by transmission electron microscopy (TEM)(**a, b**). *S. aureus* ATCC 6538, incubated with 10 mM NaP, pH 5.5, containing 0.25% glucose, for 90 min at 37°C, served as control (**c, d**). Note the condensation of electron-dense cytoplasmic material in LCE3B<sub>56-68</sub>-treated bacteria (**a, b**). Images are representative of two independent experiments, sampling on average 10 images.

**Supplementary Figure 22 a, b**

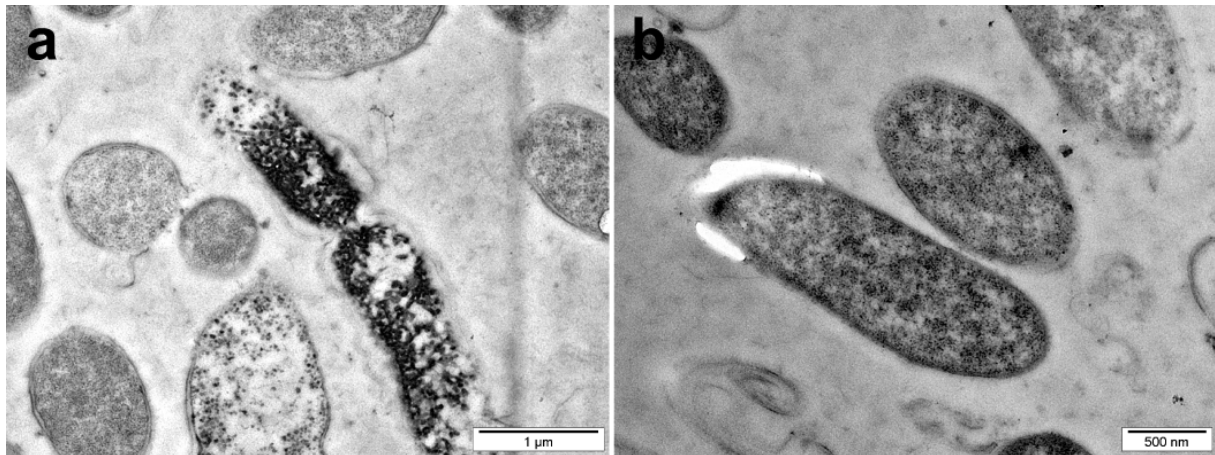

**Supplementary Figure 22 a, b | TEM of Pal-GR13-treated *E. coli*.**  $10^7$  *E. coli* ATCC 11775, suspended in 150µl 10 mM NaP, pH 7.3, containing 1% TSB, were treated with Pal-GR13 (Pal-GRRGGRGGRRGR, 375 µg/ml) for 60 min at ambient temperature and then analyzed by transmission electron microscopy (TEM) (a). *E. coli* ATCC 11775, incubated with 10 mM NaP, pH 7.3, containing 1% TSB for 60 min at ambient temperature, served as control (b). Note condensation of electron-dense cytoplasmic material in Pal-GR13-treated bacteria (a). Images are representative of two independent experiments, sampling on average 10 images.

**Supplementary Figure 22c, d**

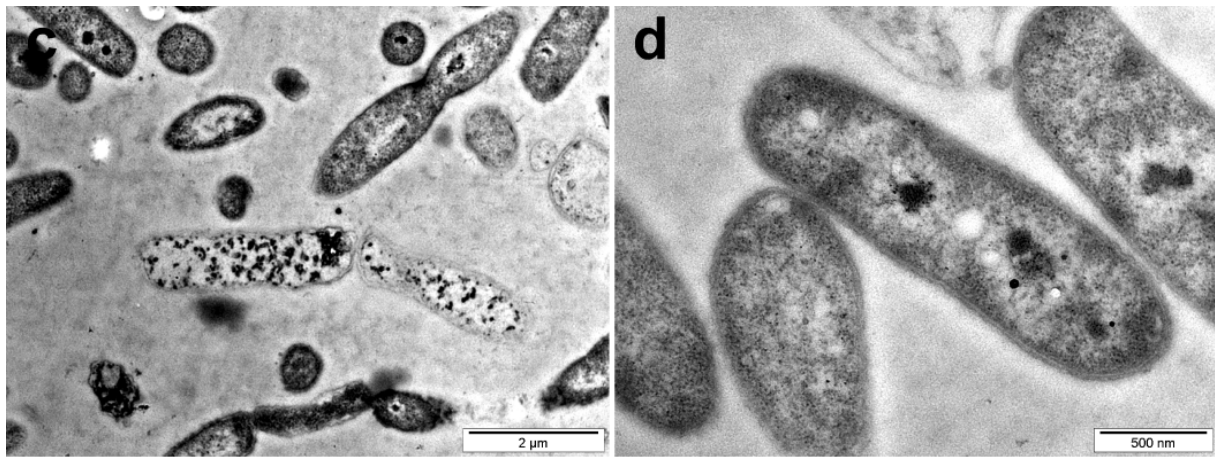

**Supplementary Figure 22c, d | TEM of Pal-GR13-treated *Burkholderia cepacia*.**

$10^7$  *Burkholderia cepacia* ATCC 25416, suspended in 150 $\mu$ l 10 mM NaP, pH 7.3, containing 1% TSB, were treated with Pal-GR13 (Pal-GRRGGRRGGRRGR, 375  $\mu$ g/ml) for 60 min at ambient temperature and then analyzed by transmission electron microscopy (TEM) (a).

*Burkholderia cepacia* ATCC 25416, incubated with 10 mM NaP, pH 7.3, containing 1% TSB for 60 min at ambient temperature, served as control (b). Note condensation of electron-dense cytoplasmic material in Pal-GR13-treated bacteria (a). Images are representative of two independent experiments, sampling on average 10 images.

Supplementary Figure 22e, f

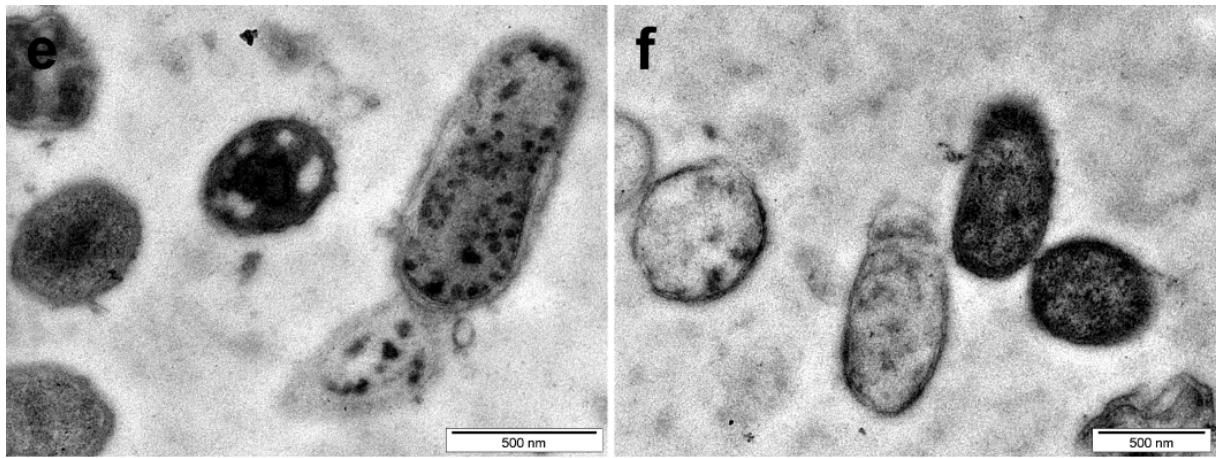

**Supplementary Figure 22e, f | TEM of Pal-GR13-treated *Prevotella oralis*.**  $10^7$  *Prevotella oralis* ATCC 33321, suspended in 150  $\mu$ l 10 mM NaP, pH 7.3, containing 1% TSB, were treated with Pal-GR13 (Pal-GRRGGRGGRGRGR, 375  $\mu$ g/ml) for 60 min at ambient temperature and aerobic conditions and then analyzed by transmission electron microscopy (TEM)(a). *Prevotella oralis* ATCC 33321, incubated with 10 mM NaP, pH 7.3, containing 1% TSB for 60 min at ambient temperature and aerobic conditions, served as control (b). Note condensation of electron-dense cytoplasmic material in Pal-GR13-treated bacteria (a). Images are representative of two independent experiments, sampling on average 10 images.

**Supplementary Figure 22g, h**

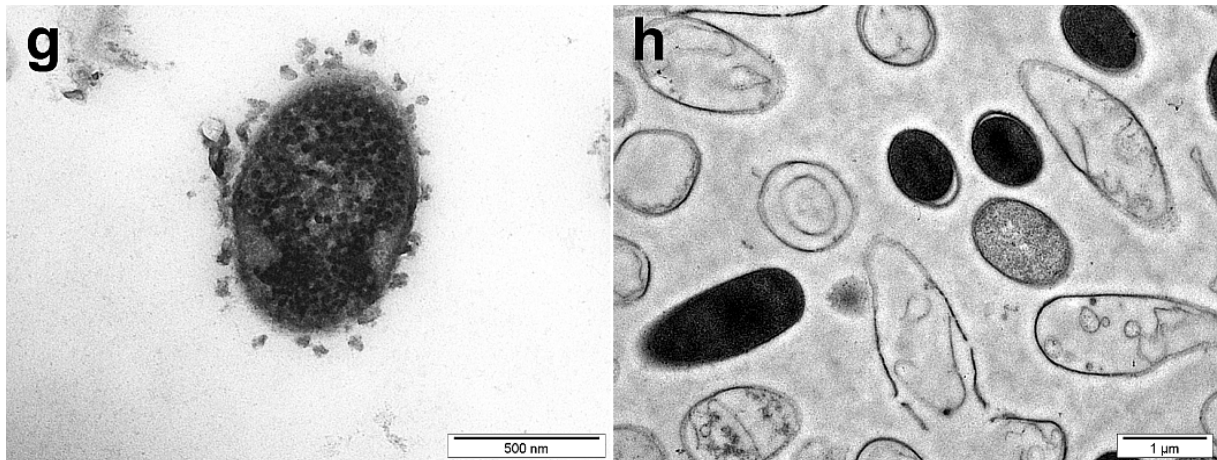

**Supplementary Figure 22g, h | TEM of Pal-GR13-treated *Clostridium perfringens*.**

$10^7$  *Clostridium perfringens* ATCC 13124, suspended in 150  $\mu$ l 10 mM NaP, pH 7.3, containing 1% TSB, were treated with Pal-GR13 (Pal-GRRGGRRGRGR, 375  $\mu$ g/ml) for 60 min at ambient temperature and aerobic conditions and then analyzed by transmission electron microscopy (TEM)(a). *Clostridium perfringens* ATCC 13124, incubated with 10 mM NaP, pH 7.3, containing 1% TSB for 60 min at ambient temperature and aerobic conditions, served as control (b). Note condensation of electron-dense cytoplasmic material and liberation of mesosome-like vesicles in Pal-GR13-treated bacteria (a). Images are representative of two independent experiments, sampling on average 10 images.

Supplementary Figure 22j, k

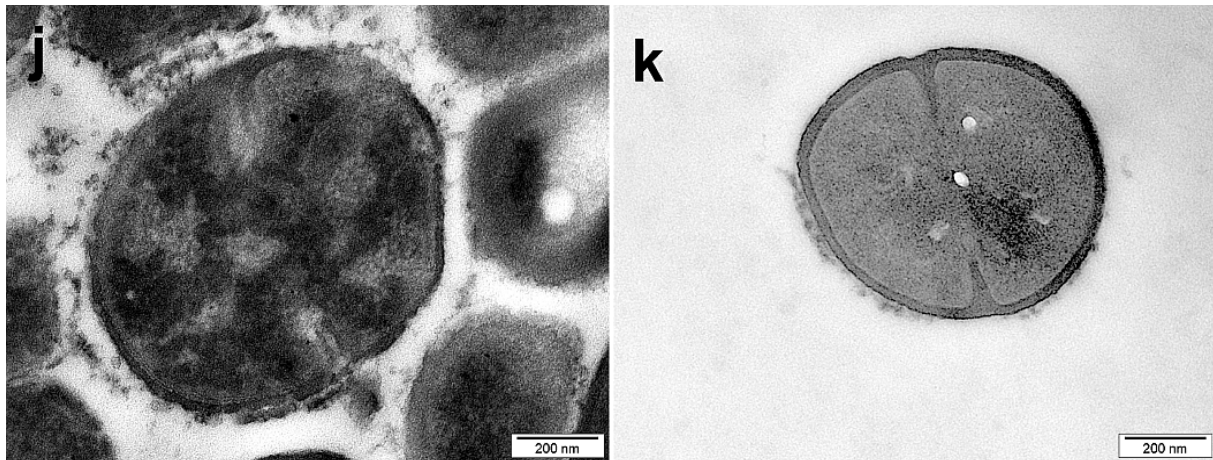

**Supplementary Figure 22j, k: TEM of Pal-GR13-treated *Staphylococcus epidermidis*.  $10^7$**  *Staphylococcus epidermidis* ATCC 14990, suspended in 150 $\mu$ l 10 mM NaP, pH 7.3, containing 1% TSB, were treated with Pal-GR13 (Pal-GRRGGRRGGRRGR, 375  $\mu$ g/ml) for 60 min at ambient temperature and then analyzed by transmission electron microscopy (TEM)(**a**). *Staphylococcus epidermidis* ATCC 14990, incubated with 10 mM NaP, pH 7.3, containing 1% TSB for 60 min at ambient temperature, served as control (**b**). Note condensation of electron-dense cytoplasmic material and liberation of mesosome-like vesicles in Pal-GR13-treated bacteria (**a**). Images are representative of two independent experiments, sampling on average 10 images.

Supplementary Figure 22 I, m

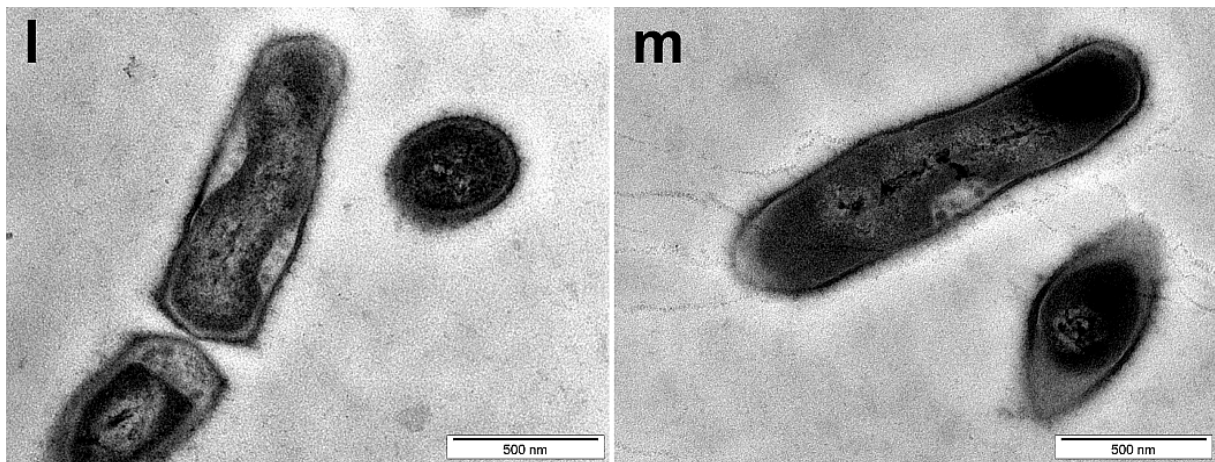

Supplementary Figure 22 I, m | TEM of Pal-GR13-treated *Propionibacterium acnes*.  $10^7$

*Propionibacterium acnes* ATCC 6919, suspended in 150 $\mu$ l 10 mM NaP, pH 7.3, containing 1% TSB, were treated with Pal-GR13 (Pal-GRRGGRGGRGRGR, 375  $\mu$ g/ml) for 60 min at ambient temperature and aerobic conditions and then analyzed by transmission electron microscopy (TEM)(a). *Propionibacterium acnes* ATCC 6919, incubated with 10 mM NaP, pH 7.3, containing 1% TSB for 60 min at ambient temperature, served as control (b). Note condensation of electron-dense cytoplasmic material in Pal-GR13-treated bacteria (a). Images are representative of two independent experiments, sampling on average 10 images.

### Supplementary Figure 23

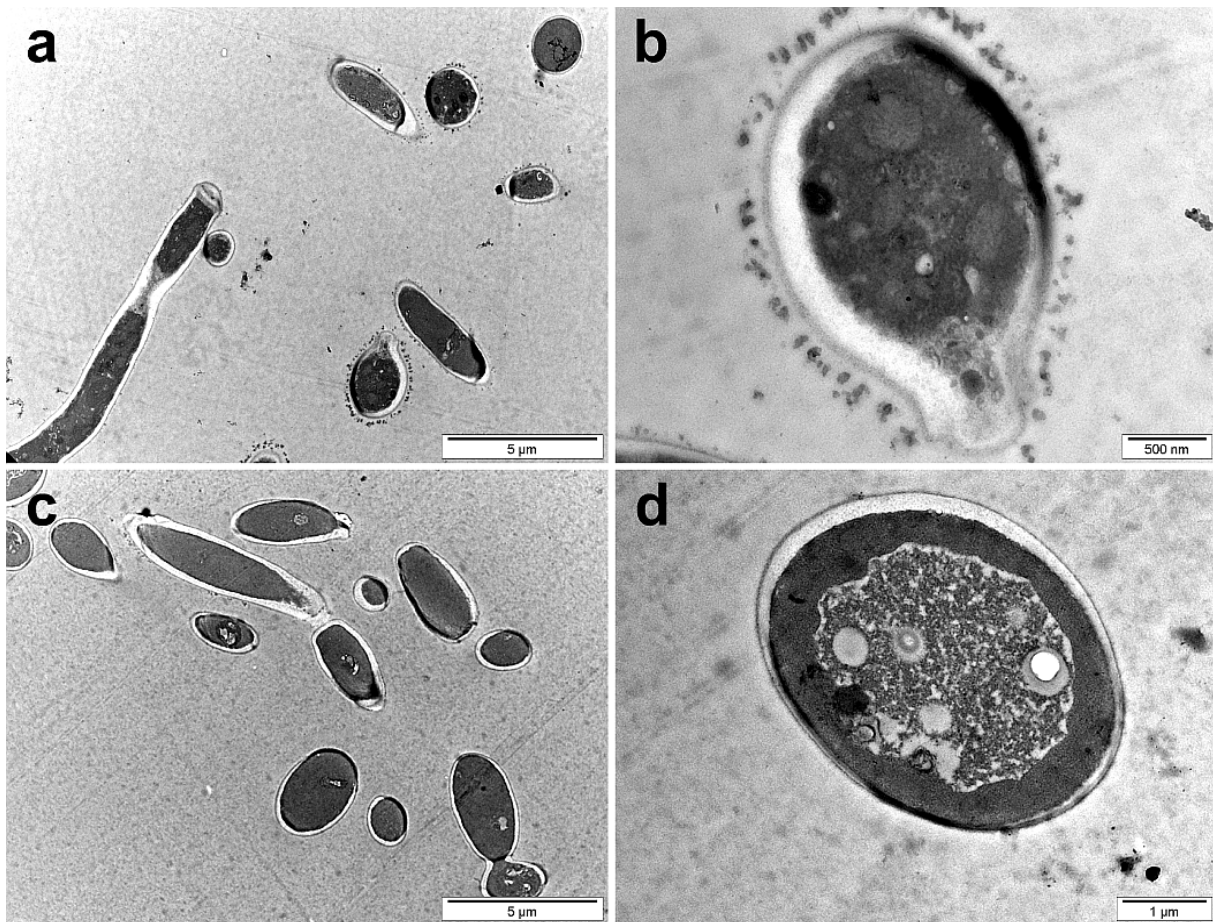

**Supplementary Figure 23 | TEM of Pal-GR13-treated *C. albicans*.**  $10^7$  *C. albicans* ATCC 24433, suspended in 150  $\mu$ l 10 mM NaP, pH 7.3, containing 1% TSB, were treated with Pal-GR13 (Pal-GRRGGRRGGRRGR, 375  $\mu$ g/ml) for 60 min at ambient temperature and then analyzed by transmission electron microscopy (TEM) (a, b). *C. albicans* ATCC 24433, incubated with 10 mM NaP, pH 7.3, containing 1% TSB for 60 min at ambient temperature, served as control (c, d). Note nuclear blebs and chromatin margination and condensation in the nucleus in Pal-GR13-treated bacteria (a, b). Images are representative of two independent experiments, sampling on average 10 images.



## Supplementary Tables

Supplementary Table 1 | Amino acid sequences of recombinant HRNR fragments used in this study.

| Name                       | Amino Acid Sequence                                                                                                                                                                                                                                               |
|----------------------------|-------------------------------------------------------------------------------------------------------------------------------------------------------------------------------------------------------------------------------------------------------------------|
| rHRNR <sub>1075-1172</sub> | T H G Q H G S T S G Q S S S C G Q H G A S S G Q S S S H G Q H G S G S S Q S S G Y G R Q G S G S G Q S P G H G R G S G S R Q S P S Y G R H G S G S G R S S S S G Q H G S G L G E S S G F G H H E S                                                                 |
| rHRNR <sub>2591-2684</sub> | S Q H G S G S G H S S G Y G Q H G S R S G Q S S R G E R H G S S S G S S S H Y G Q H G S G S R Q S S G H G R Q G S G S G Q S P S R G R H G S G Y G H S S S H G Q H G S G S G R S S S R G P Y                                                                       |
| rHRNR <sub>2638-2684</sub> | Q S S G H G R Q G S G S G Q S P S R G R H G S G Y G H S S S H G Q H G S G S G R S S S R G P Y                                                                                                                                                                     |
| rHRNR <sub>2656-2684</sub> | G R H G S G Y G H S S S H G Q H G S G S G R S S S R G P Y                                                                                                                                                                                                         |
| rHRNR <sub>2591-2644</sub> | S Q H G S G S G H S S G Y G Q H G S R S G Q S S R G E R H G S S S G S S S H Y G Q H G S G S R Q S S G H G R                                                                                                                                                       |
| rHRNR <sub>2576-2707</sub> | G F G H H E S S S G Q S S S Y Q H G S G S G H S S G Y G Q H G S R S G Q S S R G E R H G S S S G S S S H Y G Q H G S G S R Q S S G H G R Q G S G S G Q S P S R G R H G S G Y G H S S S H G Q H G S G S R S S R G P Y E S R S G H S S V F G Q H E S G S G H S S A Y |
| rHRNR <sub>2727-2850</sub> | S G Q S T F D Q E G S S T G Q S S S Y G H R G S G S S Q S S G Y G R H G A G S G Q S L S H G R H G S G S G Q S S S Y G Q H G S G S G Q S S G Y S Q H G S G S G Q D G Y S Y C K G G S N H D G G S S G S Y F L S F P S T S P Y E Y V Q E Q R C Y F Y Q               |
| SUMO3-His-tag              | M G H H H H H H G G M S E E K P K E G V K T E N D H I N L K V A G Q D G S V V Q F K I K R H T P L S K L M K A Y C E R Q G L S M R Q R F R F D G Q P I N E T D T P A Q L E M E D E D T I D V F Q Q Q T G G                                                         |

Residues cationic at pH 7, cationic only at acidic pH and anionic at pH >5 are colored blue, green and magenta, respectively.

**Supplementary Table 2 | Tryptic soybean broth (TSB) inhibits *P. aeruginosa* sensitivity towards HRNR<sub>2656-2677</sub> (HR 1-18).**

| AA-sequence         | Net charge* | Name                               | LD90 (µg/ml) | LD100 (µg/ml) | Condition** |
|---------------------|-------------|------------------------------------|--------------|---------------|-------------|
| GRHGSGLGHSSSGQHGSGR | +6          | HR 1-18, HRNR <sub>2656-2677</sub> | 0.038        | 0.15          | 0% TSB      |
| GRHGSGLGHSSSGQHGSGR | +6          | HR 1-18, HRNR <sub>2656-2677</sub> | 1.18         | 9.38          | 1% TSB      |
| GRHGSGLGHSSSGQHGSGR | +6          | HR 1-18, HRNR <sub>2656-2677</sub> | 37.5         | >300          | 3% TSB      |
| GRHGSGLGHSSSGQHGSGR | +6          | HR 1-18, HRNR <sub>2656-2677</sub> | >300         | >300          | 10% TSB     |

\*At pH 5.5. \*\*Sensitivity of *P. aeruginosa* ATCC 10145 was examined in 10 mM NaP/0.25%

glucose/pH 5.5. Residues cationic at pH 7 and cationic only at acidic pH are colored blue and green, respectively. Representatives are shown (n=2).

**Supplementary Table 3 | *P. aeruginosa*-cidal activity of HR 1-18 and its variants.**

| AA-sequence                | Net charge* | Name                               | n | LD90 (µg/ml) | LD100 (µg/ml) | Condition*** |
|----------------------------|-------------|------------------------------------|---|--------------|---------------|--------------|
| GRHGSGLGHSSSHGQHSGSGR      | +6          | HR 1-18, HRNR <sub>2656-2677</sub> | 7 | 0.038        | 0.15          | pH5.5        |
| LRHGSGLGHSSSHGQHSGSGR      | +6          | HR 1-18-Leu                        | 2 | 4.7          | >300          | pH5.5        |
| GRHGSGLGHSSSHGQHSGSGR      | +5          | HR 1-18,L-G/Q-G                    | 2 | 0.038        | 0.15          | pH5.5        |
| GRHGGGCGHGGCGGHGGGGR       | +6          | HR 1-18,L-G/Q-G/6S-6G              | 2 | 0.038        | 0.15          | pH5.5        |
| GRHGGGCGHGGCGGHGGGGR       | +6          | HR 1-18,G+H                        | 2 | <0.019       | 0.075         | pH5.5        |
| GRHGGGCGHGGCGGHGGGGR       | 0           | HR 1-18,G+H                        | 2 | >300         | >300          | pH7.3        |
| GRRGSGLGRHSSSHGGRGSGSGR    | +6          | HR 1-18,4H-4R                      | 2 | 0.038        | 0.15          | pH5.5        |
| GRRGGGCGHGGCGGHGGGGR       | +6          | HR 1-18,G+R                        | 2 | <0.019       | 0.075         | pH5.5        |
| GRRGSGLGRHSSSHGGRGSGSGR    | +6          | HR 1-18,4H-4R/L-G                  | 2 | 0.038        | 0.15          | pH5.5        |
| SRRSSLSRHSSSHGGRGSGSGR     | +6          | HR 1-18,4H-4R/9G-9S                | 2 | 0.15         | 1.18          | pH5.5        |
| Biot-GRHGSGLGHSSSHGQHSGSGR | +6          | Biotin-HR1-18                      | 2 | >300/1.18**  | >300          | pH5.5        |

\*At pH 5.5. \*\*Antimicrobial paradox<sup>16</sup>. \*\*\*Sensitivity of *P. aeruginosa* ATCC 10145 was examined in 10 mM NaP/0.25% glucose/pH 5.5 or pH 7.3. In AA-sequences, residues cationic at pH 7 and cationic only at acidic pH are colored blue and green, respectively. AA replaced by Gly, Arg, Ser or Leu or biotinylated are colored magenta. Note the increase of the LD in a Leu-mutant of HR1-18 (colored yellow) and the loss of antimicrobial activity in a Gly- and His-containing HR1-18 mutant at neutral pH (LD values colored blue and red, respectively). n: number of experiments.

**Supplementary Table 4 | *P. aeruginosa*-killing by HR1-17 mutants.**

| AA-sequence                                | Name                                               | Net charge* | LD90 (µg/ml) | LD100 (µg/ml) |
|--------------------------------------------|----------------------------------------------------|-------------|--------------|---------------|
| GRHGSGLGHSSSHGQHGSQSGR <sup>SSSR</sup> GPY | HR 1-17, HRNR <sub>2656-2684</sub>                 | +7          | 0.038        | 0.15          |
| GRHGSGLGHSSSHGQHGSQSGR <sup>SSSR</sup> GPY | HR 1-17R1-G, HRNR <sub>2656-2684</sub> R2657G      | +6          | 0.038        | 0.3           |
| GRHGSGLGHSSSHGQHGSQSGR <sup>SSSR</sup> GPY | HR 1-17R2-G, HRNR <sub>2656-2684</sub> R2677G      | +6          | 0.038        | 0.15          |
| GRHGSGLGHSSSHGQHGSQSGR <sup>SSSR</sup> GPY | HR 1-17R3-G, HRNR <sub>2656-2684</sub> R2681G      | +6          | 0.038        | 0.15-0.3      |
| GRHGSGLGHSSSHGQHGSQSGR <sup>SSSR</sup> GPY | HR 1-174H-4G, HRNR <sub>2656-2684</sub> all H vs G | +3          | 75           | >300          |

\*At pH 5.5. Residues cationic at pH 7 and cationic only at acidic pH are colored blue and green, respectively. Amino acids replaced in wild type HR1-17 by Gly are colored magenta. *P. aeruginosa* ATCC 10145-cidal activity was examined in 10 mM NaP/0.25% glucose/pH 5.5. All data shown are representatives (n=2).

**Supplementary Table 5 | *P. aeruginosa*-cidal activity of HR1-18 does not depend on its AA-sequence and chirality.**

| AA-sequence                                                                                                                                                                                                               | Net charge* | Name                                  | LD90 (µg/ml) | LD100 (µg/ml) |
|---------------------------------------------------------------------------------------------------------------------------------------------------------------------------------------------------------------------------|-------------|---------------------------------------|--------------|---------------|
| GRHGSGLGHSSSHGQHGSGSGR                                                                                                                                                                                                    | +6          | HR 1-18, HRNR <sub>2656-2677</sub>    | 0.075        | 0.59          |
| GR <sub>D</sub> H <sub>D</sub> GS <sub>D</sub> GL <sub>D</sub> GH <sub>D</sub> S <sub>D</sub> S <sub>D</sub> S <sub>D</sub> H <sub>D</sub> GQ <sub>D</sub> H <sub>D</sub> GS <sub>D</sub> GS <sub>D</sub> GR <sub>D</sub> | +6          | (D)HR 1-18, HRNR <sub>2656-2677</sub> | 0.038        | 0.3           |
| RGS <sub>D</sub> SG <sub>D</sub> HG <sub>D</sub> SS <sub>D</sub> SH <sub>D</sub> GL <sub>D</sub> SG <sub>D</sub> H <sub>D</sub> RG                                                                                        | +6          | rev-HR 1-18                           | <0.019       | 0.3           |
| SLSSGHGSGHGQRGGHRS <sub>D</sub> SG <sub>D</sub>                                                                                                                                                                           | +6          | scr-HR 1-18                           | <0.019       | 0.15          |

\*At pH 5.5. Residues cationic at pH 7 and cationic only at acidic pH are colored blue and green, respectively. *P. aeruginosa* ATCC 10145-cidal activity was examined in 10 mM NaP/0.25% glucose/pH 5.5. Data are representatives (n=3).

Supplementary Table 6 | HRNR peptides and its mutants are *P. aeruginosa*-cidal CIDAMPs.

| AA-sequence                   | Net charge* | Name                                      | n | LD90 (µg/ml) | LD100 (µg/ml) | Condition***         |
|-------------------------------|-------------|-------------------------------------------|---|--------------|---------------|----------------------|
| QSPSY                         | ±0          | HR 2-3, HRNR <sub>1137-1141</sub>         | 1 | >300         | >300          | pH5.5, 1% TSB        |
| SSSSR                         | +1          | HR 1-9, HRNR <sub>2678-2681</sub>         | 1 | >300         | >300          | pH5.5, 1% TSB        |
| SGQSSR                        | +1          | HR 1-2, HRNR <sub>2610-2615</sub>         | 1 | >300         | >300          | pH5.5, 1% TSB        |
| SSSRGPY                       | +1          | HR 1-10, HRNR <sub>2678-2684</sub>        | 1 | >300         | >300          | pH5.5, 1% TSB        |
| QSPSYGR                       | +1          | HR 2-6, HRNR <sub>1137-1143</sub>         | 1 | >300         | >300          | pH5.5, 1% TSB        |
| SGQSSRGR                      | +1          | HR 1-3, HRNR <sub>2610-2618</sub>         | 1 | >300         | >300          | pH5.5, 1% TSB        |
| GSGSRQSPSY                    | +1          | HR 2-2, HRNR <sub>1132-1141</sub>         | 1 | >300         | >300          | pH5.5, 1% TSB        |
| QGSGSQSPSR                    | +1          | HR 1-6, HRNR <sub>2645-2655</sub>         | 1 | >300         | >300          | pH5.5, 1% TSB        |
| QSSGR                         | +2          | HR 1-5, HRNR <sub>2638-2644</sub>         | 1 | >300         | >300          | pH5.5, 1% TSB        |
| SGSGSR                        | +2          | HR 2-9, HRNR <sub>1144-1150</sub>         | 1 | >300         | >300          | pH5.5, 1% TSB        |
| GSGSRQSPSYGR                  | +2          | HR 2-8, HRNR <sub>1132-1143</sub>         | 1 | 37.5         | >300          | pH5.5, 1% TSB        |
| QGSGSQSPSRGR                  | +2          | HR 1-7, HRNR <sub>2645-2657</sub>         | 1 | >300         | >300          | pH5.5, 1% TSB        |
| QSPSYGRSGSGSR                 | +3          | HR 2-5, HRNR <sub>1137-1150</sub>         | 2 | >300         | >300          | pH5.5, 1% TSB        |
| GSGSRQSPSYGRQGSGSGR           | +3          | HR 2-4Q, HRNR <sub>1132-1150</sub> H1144Q | 1 | >300         | >300          | pH5.5, 1% TSB        |
| GSGSRQSSGRGRQGSGSGQ           | +3          | HR 1-16, HRNR <sub>2632-2651</sub>        | 1 | >300         | >300          | pH5.5, 1% TSB        |
| QGSGSQSPSRGRQSGSGRQSPSY       | +3          | HR 2-1, HRNR <sub>1118-1141</sub>         | 1 | >300         | >300          | pH5.5, 1% TSB        |
| GRSGSGSQSSSYSPYSGSGWSSSR      | +3          | HRNR <sub>2422-2447</sub>                 | 2 | 18.75/150**  | >300          | pH5.5, 1% TSB        |
| GRSGSGSQSSSYSPYSGSGWSSSRGPY   | +3          | HRNR <sub>1952-1980</sub>                 | 2 | 18.75/150**  | >300          | pH5.5, 1% TSB        |
| GRSGSGSQSSSYSPYSGSGWSSSRGPY   | +3          | HRNR <sub>2422-2450</sub>                 | 2 | 2.35/>300**  | >300          | pH5.5, 1% TSB        |
| RSGLGSSS                      | +4          | HR 1-27, HRNR <sub>2657-2668</sub>        | 1 | 75-100*      | 1.18/300*     | pH5.5, 0.25% glucose |
| GRSGGLGSSS                    | +4          | HR 1-37, HRNR <sub>2656-2668</sub>        | 2 | 9.38         | >300          | pH5.5, 0.25% glucose |
| SSSGQSGSGSR                   | +4          | HR 1-38, HRNR <sub>2664-2677</sub>        | 2 | >300/9.38**  | >300          | pH5.5, 0.25% glucose |
| SRQSPSYGRSGSR                 | +4          | HR 2-15, HRNR <sub>1135-1148</sub> S1148R | 1 | 75           | >300          | pH5.5, 1% TSB        |
| RQSPSYGRSGSGSR                | +4          | HR 2-14, HRNR <sub>1136-1150</sub>        | 1 | 300          | >300          | pH5.5, 1% TSB        |
| GSGSRQSPSYGRSGSGSR            | +4          | HR 2-4, HRNR <sub>1132-1150</sub>         | 4 | >300         | >300          | pH5.5, 1% TSB        |
| SRQSPSYGRSGSGSR               | +4          | HR 2-13, HRNR <sub>1135-1150</sub>        | 1 | >300         | >300          | pH5.5, 1% TSB        |
| GSRQSPSYGRSGSGSR              | +4          | HR 2-12, HRNR <sub>1134-1150</sub>        | 1 | >300         | >300          | pH5.5, 1% TSB        |
| GSGSRQSSYGRSGSGSR             | +4          | HR 2-4S, HRNR <sub>1132-1150</sub> P1139S | 2 | 150          | >300          | pH5.5, 1% TSB        |
| GSGSRQSLYGRSGSGSR             | +4          | HR 2-4L, HRNR <sub>1132-1150</sub> P1139L | 1 | 75           | >300          | pH5.5, 1% TSB        |
| SGSSSSSYGQSGSGSR              | +4          | HR 1-4, HRNR <sub>2619-2637</sub>         | 1 | 150          | >300          | pH5.5, 1% TSB        |
| SGSGSGSSGYGQSGSR              | +4          | HR 1-1, HRNR <sub>2591-2609</sub>         | 1 | >300         | >300          | pH5.5, 1% TSB        |
| GRSGSGSQSSSYGPYSGSGWSSSRGPY   | +4          | HRNR <sub>1013-1041</sub>                 | 2 | 1.18/75**    | >300          | pH5.5, 1% TSB        |
| RSGLGSSS                      | +5          | HR 1-26, HRNR <sub>2657-2671</sub>        | 2 | 0.3/150**    | >300/2,35     | pH5.5, 0.25% glucose |
| GRSGGLGSSSGQ                  | +5          | HR 1-25, HRNR <sub>2656-2671</sub>        | 2 | 0.3          | 4.7           | pH5.5, 0.25% glucose |
| SGRQSGSRQSPSYGR               | +5          | HR 2-16, HRNR <sub>1128-1144</sub>        | 2 | 0.59/300**   | 37.5          | pH5.5, 0.25% glucose |
| GSGSRQSPSRGRSGSGSR            | +5          | HR 2-4R, HRNR <sub>1132-1150</sub> Y1141R | 2 | 37.5/300**   | >300          | pH5.5, 1% TSB        |
| GSGSRQSPSRGRSGSGSR            | +5          | HR 2-4H, HRNR <sub>1132-1150</sub> Y1141H | 2 | 75           | >300          | pH5.5, 1% TSB        |
| SGSLGSSSGQSGSGSR              | +5          | HR 1-8, HRNR <sub>2658-2677</sub>         | 1 | 18.75/>300** | >300          | pH5.5, 1% TSB        |
| RSGLGSSSGQSGSGSR              | +5          | HR 1-8, HRNR <sub>2658-2677</sub>         | 1 | 4.7          | >300          | pH5.5, 0.25% glucose |
| SGSRSGQSSRGRSGSSSS            | +5          | HR1-11, HRNR <sub>2606-2628</sub>         | 2 | 0.075        | 2.35          | pH5.5, 0.25% glucose |
| GSGSRQSPSYGRSGSGSRSSSSGQ      | +5          | HR 2-11, HRNR <sub>1132-1157</sub>        | 2 | 37.5         | >300          | pH5.5, 1% TSB        |
| GRSGSGSSSGQSGSGSR             | +6          | HRNR <sub>2186-2207</sub>                 | 2 | 0.15/75**    | 4.7-9.37**    | pH5.5, 0.25% glucose |
| GRSGGLGSSSGQSGSGSR            | +6          | HR 1-18, HRNR <sub>2656-2677</sub>        | 7 | 0.038        | 0.15          | pH5.5, 0.25% glucose |
| LRSGGLGSSSGQSGSGSR            | +6          | HR 1-18-Leu,                              | 2 | 4.7          | >300          | pH5.5, 0.25% glucose |
| LGSSSGQSGSGSRSSSRGPYPSRLG     | +6          | HR 1-36, HRNR <sub>2663-2690</sub>        | 2 | 0.15         | 2.35          | pH5.5, 0.25% glucose |
| GRSGGLGSSSGQSGSGSRSSSRGPY     | +7          | HR 1-17, HRNR <sub>2656-2684</sub>        | 2 | 0.038        | 0.15          | pH5.5, 0.25% glucose |
| GRSGSGSSGYTQSGSGSSSYGRSGSR    | +8          | HRNR <sub>933-994</sub>                   | 2 | 0.3          | 2.35          | pH5.5, 0.25% glucose |
| GRSGSGSRQSPSRGRSGSGSSSGQSGSR  | +9          | HRNR <sub>295-361</sub>                   | 2 | 0.15         | 0.59          | pH5.5, 0.25% glucose |
| GSSYSYRCHYSGSGTSGFGQSGSGSSSEY | +9          | HRNR <sub>995-1056</sub>                  | 2 | 0.3          | 2.35          | pH5.5, 0.25% glucose |
| LRSGGLGSSSGQSGSGSR            | +10         | HRNR <sub>232-294</sub>                   | 2 | 0.3          | 2.35          | pH5.5, 0.25% glucose |

\*At pH 5.5. \*\*Antimicrobial paradox<sup>16</sup>. \*\*\*Sensitivity of *P. aeruginosa* ATCC 10145 was examined in 10 mM NaP. Residues cationic at pH 7, cationic only at acidic pH, anionic and mutated are colored blue, green, magenta and yellow, respectively. Note the marked increase of the LD value when a selected AA is replaced in defined HRNR-peptides (LD values colored in yellow). n: number of experiments.

Supplementary Table 7 | IDPRs of FLG-2, FLG and Repetin are *P. aeruginosa*-cidal CIDAMPs.

| AA-sequence                 | Name                       | n | Net charge* | LD90 (µg/ml) | LD100 (µg/ml) |
|-----------------------------|----------------------------|---|-------------|--------------|---------------|
| TAGRRGSG                    | FLG-2 <sub>2097-2105</sub> | 1 | +3          | >300         | >300          |
| GSRTAGRRGSG                 | FLG-2 <sub>2094-2105</sub> | 1 | +4          | >300/2.35**  | >300          |
| HAHSGHGQSTQR                | FLG-2 <sub>2082-2093</sub> | 2 | +4          | 0.15         | 2.35          |
| HTHSGHTHGQSGSQHGESESIIDR    | FLG-2 <sub>1515-1539</sub> | 2 | +4          | 0.075        | 0.59          |
| HAHSGHGQSTQRGSR             | FLG-2 <sub>2082-2096</sub> | 2 | +5          | 0.15         | 1.18          |
| HTHSGHTHGQAGSHYPESGSSVHER   | FLG-2 <sub>1969-1993</sub> | 2 | +5          | 0.038        | 0.3           |
| HTHSGHAHGQAGSQHGESGSSVHER   | FLG-2 <sub>2044-2068</sub> | 1 | +5          | 0.038        | 0.3           |
| HTHSGHTHGQARSQHGESISIVHER   | FLG-2 <sub>1742-1766</sub> | 2 | +5          | 0.038        | 0.15          |
| THHEQSHQRRDRQTHEDKQNRQR     | RPTN <sub>747-770</sub>    | 2 | +5          | 0.3          | 150           |
| HGQSTQRGSRTAGRRGSG          | FLG-2 <sub>2087-2105</sub> | 2 | +6          | 0.075        | 1.18          |
| HAHSGHGQSTQRGSRTAGR         | FLG-2 <sub>2082-2100</sub> | 2 | +6          | 0.038        | 0.3           |
| HAHYGYGQSTQRGSRTTGRRGSG     | FLG-2 <sub>2232-2255</sub> | 2 | +7          | 0.075        | 0.59          |
| QGSHHHQSVNRSGHSGSHSHHTTSQGR | FLG <sub>528-554</sub>     | 2 | +7          | 0.15         | 0.59          |
| HTHSGHTHSQARSQHGESISTVHKR   | FLG-2 <sub>1894-1918</sub> | 2 | +7          | 0.038        | 0.3           |
| HAHSGHGQSTQRGSRTAGRRGSG     | FLG-2 <sub>2082-2105</sub> | 2 | +8          | < 0.038      | 0.075         |

\*At pH 5.5. \*\*Antimicrobial paradox<sup>16</sup>. Residues cationic at pH 7, cationic only at acidic pH and anionic are colored blue, green and magenta, respectively. Sensitivity of *P. aeruginosa* ATCC 10145 was tested in 10 mM NaP/0.25% glucose/pH5.5. n: number of experiments.

Supplementary Table 8 | CIDAMPs with *S. aureus* ATCC 6538-cidal activity

| AA-sequence                                                                                                                                                                  | Name                               | Net charge* | n | LD90 (µg/ml) | LD100 (µg/ml)            | Condition** |
|------------------------------------------------------------------------------------------------------------------------------------------------------------------------------|------------------------------------|-------------|---|--------------|--------------------------|-------------|
| GR <sup>blue</sup> GSGLG <sup>blue</sup> SSSS <sup>green</sup> GQ <sup>blue</sup> GSGSGR <sup>blue</sup>                                                                     | HR 1-18, HRNR <sub>2656-2677</sub> | +6          | 2 | >300         | >300                     | pH5.5       |
| LR <sup>magenta</sup> GSGLG <sup>blue</sup> SSSS <sup>green</sup> GQ <sup>blue</sup> GSGSGR <sup>blue</sup>                                                                  | HR 1-18-Leu G2656Leu               | +6          | 2 | 300          | >300                     | pH5.5       |
| GRR <sup>blue</sup> GSGLGR <sup>blue</sup> SSSR <sup>green</sup> GGRR <sup>blue</sup> GSGSGR <sup>blue</sup>                                                                 | HR 1-18,4H-4R                      | +6          | 2 | 150          | >300                     | pH5.5       |
| GRR <sup>blue</sup> GSGLGR <sup>blue</sup> SSSR <sup>green</sup> GGRR <sup>blue</sup> GSGSGR <sup>blue</sup>                                                                 | HR 1-18,4H-4R                      | +6          | 2 | 9.375        | >300, max.killing: 98.8% | pH7.0       |
| GRR <sup>blue</sup> GSGLGR <sup>blue</sup> SSSR <sup>green</sup> GGRR <sup>blue</sup> GSGSGR <sup>blue</sup>                                                                 | HR 1-18,4H-4R/L-G                  | +6          | 1 | >300         | >300                     | pH5.5       |
| GRR <sup>blue</sup> GG <sup>blue</sup> GR <sup>blue</sup> GGRR <sup>blue</sup> GGRR <sup>blue</sup> GGRR <sup>blue</sup>                                                     | HR 1-18,G+R                        | +6          | 1 | >300         | >300                     | pH5.5       |
| SR <sup>magenta</sup> SS <sup>green</sup> SL <sup>blue</sup> SR <sup>blue</sup> SSSR <sup>green</sup> SSSR <sup>green</sup> SSSR <sup>green</sup>                            | HR 1-18,4H-4R/9G-9S                | +6          | 1 | 150          | >300                     | pH5.5       |
| SR <sup>magenta</sup> SS <sup>green</sup> SL <sup>blue</sup> SR <sup>blue</sup> SSSR <sup>green</sup> SSSR <sup>green</sup> SSSR <sup>green</sup>                            | HR 1-18,4H-4R/9G-9S                | +6          | 2 | 75           | >300                     | pH7.2       |
| GRR <sup>blue</sup> GGRR <sup>blue</sup> GGRR <sup>blue</sup>                                                                                                                | GR13                               | +6          | 2 | 75           | >300                     | pH5.5       |
| GRR <sup>blue</sup> GGRR <sup>blue</sup> GGRR <sup>blue</sup>                                                                                                                | GR13                               | +6          | 1 | 75           | >300                     | pH7.0       |
| SH <sup>blue</sup> RC <sup>blue</sup> CR <sup>blue</sup> SH <sup>blue</sup> RCRR <sup>blue</sup>                                                                             | LCE-3B <sub>56-68</sub>            | +8          | 2 | <b>0.075</b> | >150, max.killing: 99.3% | pH5.5       |
| SH <sup>blue</sup> RR <sup>blue</sup> FR <sup>blue</sup> SH <sup>blue</sup> QCRR <sup>blue</sup>                                                                             | LCE-3C <sub>55-67</sub>            | +8          | 2 | 2.35         | >150, max.killing: 97.7% | pH5.5       |
| SH <sup>blue</sup> RR <sup>blue</sup> FR <sup>blue</sup> SH <sup>blue</sup> QCRR <sup>blue</sup> QR <sup>blue</sup> SN <sup>blue</sup> SC <sup>blue</sup> DR <sup>blue</sup> | LCE-3C <sub>55-75</sub>            | +9          | 2 | 0.59         | >150, max.killing: 99.4% | pH5.5       |
| SH <sup>blue</sup> RPRL <sup>blue</sup> F <sup>blue</sup> RRRR <sup>blue</sup>                                                                                               | LCE-2B <sub>74-86</sub>            | +9          | 2 | 1.18         | >150, max.killing: 97.4% | pH5.5       |

\*At pH 5.5. \*\* *S. aureus* ATCC 6538 sensitivity was examined in 10 mM NaP/0.25% glucose/pH5.5, pH 7.0 or pH 7.2. Residues cationic at pH 7 and cationic only at acidic pH are colored blue and green, respectively. Amino acids in HR1-18 replaced by Gly, Arg, Ser or Leu are colored magenta. Note the higher antimicrobial potency of selected CIDAMPs at neutral pH (shaded) and the highest potency of the “Late-Cornified-Envelope (LCE) protein” fragment LCE-3B<sub>56-68</sub> at acidic pH (bold). n: number of experiments.



**Supplementary Table 9 | *S. aureus* ATCC 6538 -bactericidal activity of S-palmitoylated HRNR-CIDAMPs.**

| AA-sequence                        | Name                      | n | Net charge | LD90 (µg/ml) | LD100 (µg/ml) | Condition***         |
|------------------------------------|---------------------------|---|------------|--------------|---------------|----------------------|
| GQHGSSSGHSSTHGQHGSTSGQSSSC-Pal*    | HRNR <sub>598-623</sub>   | 2 | +4         | 2.35         | >150          | pH5.5, 0.25% glucose |
| GQHGSSSGHSSTHGQHGASGQSSSC-Pal*     | HRNR <sub>2004-2029</sub> | 2 | +4         | 0.59         | >150/75**     | pH5.5, 0.25% glucose |
| Pal-CGQHGATSGQSSSHGQHGSGSSQSSR     | HRNR <sub>623-648</sub>   | 2 | +4         | 2.35         | >150          | pH5.5, 0.25% glucose |
| Pal-CGQHGATSSGQSSSHGQHGSGSSQSSGYGR | HRNR <sub>1089-1117</sub> | 2 | +4         | >150         | >150          | pH5.5, 0.25% glucose |
| GRHGSGSGQSSGFCHHESSSWQSSGC-Pal*    | HRNR <sub>1389-1414</sub> | 2 | +4         | 1.18         | 18.8          | pH5.5, 0.25% glucose |
| SGHSSVFGQHSGSGHSSAYSQHSGSGHFC-Pal* | HRNR <sub>1748-1778</sub> | 2 | +4         | 0.3          | 9.38          | pH5.5, 0.25% glucose |

\*amide, \*\*antimicrobial paradox<sup>16</sup>. \*\*\*Antimicrobial activity was examined in 10 mM NaP. Residues cationic at pH 7, cationic only at acidic pH, anionic and S-palmitoyl-Cys are colored blue, green, magenta and yellow, respectively. Hydrophobic residues are shaded grey. n: number of experiments.

**Supplementary Table 10 | Sensitivity of *Corynebacterium simulans* and *P. aeruginosa* towards selected FLG- and HRNR-derived CIDAMPs**

| AA-sequence                                                                                                                        | Name                     | n   | Net charge* | LD90<br><i>C. simulans</i><br>(µg/ml) | LD100<br><i>C. simulans</i><br>(µg/ml) | LD90<br><i>P. aeruginosa</i><br>(µg/ml) | LD100<br><i>P. aeruginosa</i><br>(µg/ml) |
|------------------------------------------------------------------------------------------------------------------------------------|--------------------------|-----|-------------|---------------------------------------|----------------------------------------|-----------------------------------------|------------------------------------------|
| QGS <sup>H</sup> HE <sup>H</sup> QSVNR <sup>R</sup> SG <sup>H</sup> SGS <sup>H</sup> HS <sup>H</sup> HTTSQGR                       | FLG <sub>528-554</sub>   | 1/2 | +7          | >150                                  | >150                                   | 0.15                                    | 0.59                                     |
| <sup>H</sup> TQNSSSGQAASS <sup>H</sup> EQAR                                                                                        | FLG <sub>684-701</sub>   | 1/1 | +3          | >150                                  | >150                                   | >300                                    | >300                                     |
| QSGTR <sup>H</sup> ETSSGGQAASS <sup>H</sup> EQAR                                                                                   | FLG <sub>1652-1674</sub> | 1/1 | +1          | >150                                  | >150                                   | >300                                    | >300                                     |
| QSGT <sup>H</sup> HA <sup>H</sup> TNSSGGQAASS <sup>H</sup> EQAR                                                                    | FLG <sub>2301-2323</sub> | 1/1 | +2          | >150                                  | >150                                   | >300                                    | 300                                      |
| QSGTR <sup>H</sup> ETQTSSGGQAASS <sup>H</sup> EQAR                                                                                 | FLG <sub>2625-2647</sub> | 1/1 | +3          | >150                                  | >150                                   | >300                                    | >300                                     |
| QSGTR <sup>H</sup> EA <sup>H</sup> TSSGGQAASS <sup>H</sup> EQAR                                                                    | FLG <sub>3273-3295</sub> | 1/1 | +2          | >150                                  | >150                                   | >300                                    | 300                                      |
| SG <sup>H</sup> KSSSGQSSGY <sup>Q</sup> HGSGSG <sup>H</sup> SSGYG <sup>Q</sup> HGSR <sup>R</sup> SGQSSR                            | HRNR <sub>232-294</sub>  | 2/1 | +11         | 1.18                                  | >150/37.5**                            | 0.3                                     | 2.35                                     |
| <sup>G</sup> DR <sup>R</sup> HRSSSGSSSSSYG <sup>Q</sup> HGSGSRQSL                                                                  |                          |     |             |                                       |                                        |                                         |                                          |
| <sup>G</sup> HGRQSGSR <sup>R</sup> QSPS <sup>H</sup> VR <sup>H</sup> HGSGSG <sup>H</sup> SSS <sup>H</sup> GQ <sup>H</sup> HGSGSSYS | HRNR <sub>295-361</sub>  | 2/1 | +10         | 0.59                                  | 75/9.375**                             | 0.15                                    | 0.59                                     |
| YSR <sup>G</sup> HY <sup>E</sup> SGSGQTSGFGQ <sup>H</sup> ESGSGQSSGY                                                               |                          |     |             |                                       |                                        |                                         |                                          |
| <sup>G</sup> HKSSSGQSSGYT <sup>Q</sup> HGSGSG <sup>H</sup> SSSYE <sup>Q</sup> HGSR <sup>R</sup> SGQSSRS                            | HRNR <sub>933-994</sub>  | 1/1 | +8          | 4.7                                   | >150                                   | 0.3                                     | 2.35                                     |
| <sup>E</sup> QHSSSGSSSSSYG <sup>Q</sup> HGSGSRQSL                                                                                  |                          |     |             |                                       |                                        |                                         |                                          |
| LG <sup>H</sup> HGQ <sup>H</sup> HGSGSGQSPSPS <sup>R</sup> GR <sup>H</sup> HGSGSGQSSSYG <sup>P</sup> YRSGS                         | HRNR <sub>995-1056</sub> | 1/1 | +8          | 4.7                                   | >150                                   | 0.3                                     | 2.35                                     |
| GWSSSR <sup>G</sup> PY <sup>E</sup> SGSG <sup>H</sup> SSSLG <sup>H</sup> RES <sup>R</sup>                                          |                          |     |             |                                       |                                        |                                         |                                          |

\*at pH 5.5. \*\*antimicrobial paradox<sup>16</sup>. Residues cationic at pH 7, cationic only at acidic pH and

anionic are colored blue, green and magenta, respectively. Sensitivity of *P. aeruginosa* ATCC 10145 towards the peptides was tested at pH 5.5 and towards *Corynebacterium simulans* DSM 44415 it was tested at pH 6.0 in 10 mM NaP/0.25% glucose. n: number of experients.

**Supplementary Table 11 | Palmitoylated or myristoylated CIDAMPs containing Arg, His, Lys, Dab or Dap as cationic AAs are bactericidal for *P. aeruginosa* ATCC 10145**

| AA-sequence                                                                                          | Name                                       | n | LD100 (µg/mL) | LD90 (µg/mL) | Condition            |
|------------------------------------------------------------------------------------------------------|--------------------------------------------|---|---------------|--------------|----------------------|
| Pal-GRHGSGLGHSSSHGQHGSQSGSR                                                                          | Pal-HR 1-18, Pal-HRNR <sub>2656-2677</sub> | 2 | 0.59          | 0.075        | pH5.5, 0.25% glucose |
| Myr-GRHGSGLGHSSSHGQHGSQSGSR                                                                          | Myr-HR 1-18, MyrHRNR <sub>2656-2677</sub>  | 1 | 0.3           | 0.075        | pH5.5, 0.25% glucose |
| Pal-GRRGSGGLGRSSSRGQRGSGSGSR                                                                         | Pal-HR 1-18-HR                             | 2 | 0.59          | 0.038        | pH5.5, 0.25% glucose |
| Pal-GRRGSGGLGRSSSRGQRGSGSGSR                                                                         | Pal-HR 1-18-HR                             | 1 | 4.7           | 1.18         | pH7.3, 1% TSB        |
| Pal-HGSRSGQSSRGERHGSSSGSSSH                                                                          | HR 1-11, HRNR <sub>2606-2628</sub>         | 2 | 0.3           | 0.075        | pH5.5, 0.25% glucose |
| Pal-RGSRSGQSSRGERRRGSSSSGSSSR                                                                        | Pal-HR 1-11-3H3R                           | 2 | 0.15          | 0.038        | pH5.5, 0.25% glucose |
| Pal-RGSRSGQSSRGERRR                                                                                  | Pal-HR 1-11-2H2R-14                        | 1 | 0.15          | 0.038        | pH5.5, 0.25% glucose |
| Pal-GHHGGHGGHGHGH                                                                                    | Pal-GH13                                   | 1 | 0.3           | 0.075        | pH5.5, 0.25% glucose |
| Pal-GRRGGRGGRGRGR                                                                                    | Pal-GR13                                   | 1 | 0.3           | 0.038        | pH5.5, 0.25% glucose |
| Pal-GR <sub>0</sub> R <sub>0</sub> GGR <sub>0</sub> GGR <sub>0</sub> GR <sub>0</sub> GR <sub>0</sub> | (D)-Pal-GR13                               | 1 | 0.3           | 0.075        | pH5.5, 0.25% glucose |
| Pal-GRRGGRGGRGR                                                                                      | Pal-GR11                                   | 2 | 0.3           | 0.075        | pH5.5, 0.25% glucose |
| Pal-GRRGGRGGR                                                                                        | Pal-GR9                                    | 1 | 0.59          | 0.038        | pH5.5, 0.25% glucose |
| Pal-GR <sub>0</sub> R <sub>0</sub> GGR <sub>0</sub> GGR <sub>0</sub>                                 | (D)-Pal-GR9                                | 1 | 0.59          | 0.038        | pH5.5, 0.25% glucose |
| Pal-GRRGGR                                                                                           | Pal-GR6                                    | 1 | 4.7           | 1.18         | pH5.5, 0.25% glucose |
| Pal-GRGR                                                                                             | Pal-GR4                                    | 2 | 9.375         | 2.35         | pH5.5, 0.25% glucose |
| Pal-GR <sub>0</sub> GR <sub>0</sub>                                                                  | Pal-(D)-GR4                                | 1 | 150           | 18.75        | pH5.5, 0.25% glucose |
| Pal-GKKGKGGKGGKGGKGGK                                                                                | Pal-K-GR13                                 | 1 | 0.15          | <0.019       | pH5.5, 0.25% glucose |
| Pal-GOOGGOGGGOGGOGO                                                                                  | Pal-Orn-GR13                               | 1 | 0.3           | 0.075        | pH5.5, 0.25% glucose |
| Pal-GKGGK                                                                                            | Pal-GK4                                    | 2 | 9.375         | 2.38         | pH5.5, 0.25% glucose |
| Pal-GK <sub>0</sub> GK <sub>0</sub>                                                                  | Pal-(D)-GK4                                | 1 | 4.7           | 1.18         | pH5.5, 0.25% glucose |
| Pal-GOGO                                                                                             | Pal-GO4                                    | 1 | 18.75         | 2.35         | pH5.5, 0.25% glucose |
| Pal-GO <sub>0</sub> GO <sub>0</sub>                                                                  | Pal-(D)-GO4                                | 1 | 9.38          | 1.18         | pH5.5, 0.25% glucose |
| Pal-GlyDabGlyDab                                                                                     | Pal-G-Dab4                                 | 1 | 9.38          | 2.35         | pH5.5, 0.25% glucose |
| Pal-GlyDapGlyDap                                                                                     | Pal-G-Dap4                                 | 2 | 9.38          | 2.35         | pH5.5, 0.25% glucose |
| Pal-GRRGSGGLGRSSSR                                                                                   | Pal-HR 1-18-3H3R-GR13                      | 2 | 4.7           | 0.59         | pH5.5, 0.25% glucose |

Residues cationic at pH 7, cationic only at acidic pH and anionic at pH 7 are colored blue, green and magenta, respectively. Dab: L-2,4-Diaminobutyric acid, Dap:L-2,3-Diaminopropionic acid. n: number of experiments.

**Supplementary Table 12 | Late cornified envelope protein (LCE)-peptide fragments and its palmitoylated derivatives are potent and efficient *S. aureus*-cidal antimicrobials.**

| AA-sequence                                                     | Name                         | Net Charge* | LD100 (µg/mL)            | LD90 (µg/mL)     | Condition            |
|-----------------------------------------------------------------|------------------------------|-------------|--------------------------|------------------|----------------------|
| SHHRCCRS <sup>SH</sup> RCRR                                     | LCE-3B <sub>56-68</sub>      | +8          | >150, max.killing: 99.3% | <b>0.075</b>     | pH5.5, 0.25% glucose |
| SHHRHF <sup>RS</sup> HQCRR                                      | LCE-3C <sub>55-67</sub>      | +8          | >150, max.killing: 97.7% | 2.35             | pH5.5, 0.25% glucose |
| SHHRHF <sup>RS</sup> HQCRRQR <sup>SN</sup> SC <sup>DR</sup>     | LCE-3C <sub>55-75</sub>      | +9          | >150, max.killing: 99.4% | 0.59             | pH5.5, 0.25% glucose |
| Pal-SHHRCCRS <sup>SH</sup> RCRR                                 | Pal- LCE-3B <sub>56-68</sub> | +8          | 0.15                     | <b>&lt;0.019</b> | pH5.5, 0.25% glucose |
| Pal-SHHRHF <sup>RS</sup> HQCRR                                  | Pal- LCE-3C <sub>55-67</sub> | +8          | 0.3                      | <b>0.038</b>     | pH5.5, 0.25% glucose |
| Pal-SHHRHF <sup>RS</sup> HQCRRQR <sup>SN</sup> SC <sup>DR</sup> | Pal- LCE-3C <sub>55-75</sub> | +9          | 0.59                     | 0.15             | pH5.5, 0.25% glucose |

Residues cationic at pH 7, cationic only at acidic pH and anionic are colored blue, green and magenta, respectively. \*: at pH 5.5. Representatives are shown (n=2).

**Supplementary Table 13 | Antimicrobial activity spectrum of Palmitoyl-HR1-18.\***

| Microorganism                                | n | LD100<br>(µg/mL) | LD90<br>(µg/mL) | Conditions             |
|----------------------------------------------|---|------------------|-----------------|------------------------|
| <i>Burkholderia cepacia</i> ATCC 25416       | 2 | >300             | 75              | pH 7.3, 0.25% glucose  |
| <i>Burkholderia cepacia</i> ATCC 25416       | 2 | >300             | >300            | pH 5.5, 0.25% glucose  |
| <i>Klebsiella pneumoniae</i> ATCC 13883      | 1 | 1.18             | 0.3             | pH 5.5, 0.25% glucose  |
| <i>Prevotella oralis</i> ATCC 33321          | 1 | >300             | 37.5            | pH 6.5, 0.25 % glucose |
| <i>Prevotella oralis</i> ATCC 33321          | 2 | 150              | 18.75           | pH 7.3, 1 % TSB        |
| <i>Pseudomonas aeruginosa</i> ATCC10145      | 2 | 0.59             | 0.075           | pH 5.5, 0.25% glucose  |
| <i>Clostridium perfringens</i> ATCC 13124    | 1 | 37.5             | 18.75           | pH 7.3, 1 % TSB        |
| <i>Clostridium perfringens</i> ATCC 13124    | 1 | 75               | 37.5            | pH 5.5, 0.25% glucose  |
| <i>Clostridium perfringens</i> ATCC 13124    | 1 | 18.75            | 4.7             | pH 7.3, 0.25% glucose  |
| <i>Propionibacterium acnes</i> ATCC 6919     | 1 | 0.59             | 0.3             | pH 5.5, 0.25% glucose  |
| <i>Propionibacterium acnes</i> ATCC 6919     | 1 | 4.7              | 1.18            | pH 7.3, 1 % TSB        |
| <i>Propionibacterium acnes</i> ATCC 6919     | 1 | 2.35             | 0.59            | pH 7.3, 0.25% glucose  |
| <i>Staphylococcus aureus</i> ATCC 6538       | 2 | 37.5             | 1.18            | pH 5.5, 0.25% glucose  |
| <i>Staphylococcus aureus</i> ATCC 6538       | 1 | >300             | >300            | pH 7.3, 1 % TSB        |
| <i>Staphylococcus epidermidis</i> ATCC 14990 | 1 | >300             | >300            | pH 7.3, 1 % TSB        |
| <i>Streptococcus pneumoniae</i> ATCC 33400   | 2 | 9.37             | 2.35            | pH 6.5, 0.25% glucose  |
| <i>Streptococcus pneumoniae</i> ATCC 33400   | 1 | 37.5             | 9.38            | pH 7.3, 1 % TSB        |
| <i>Streptococcus pneumoniae</i> ATCC 33400   | 1 | 4.7              | 2.35            | pH 7.3, 0.25% glucose  |
| <i>Streptococcus pyogenes</i> ATCC 12344     | 2 | 0.59             | 0.15            | pH 6.0, 0.25% glucose  |
| <i>Streptococcus pyogenes</i> ATCC 12344     | 1 | 9.38             | 9.38            | pH 7.3, 1 % TSB        |
| <i>Streptococcus pyogenes</i> ATCC 12344     | 1 | 0.3              | 0.15            | pH 7.3, 0.25% glucose  |

\*AA-sequence: Pal-GRHGSGGLGHSSSHGQHGSGSGR. Sensitivity of bacteria towards Pal-HR1-18 was tested in a CFU assay system in 10 mM NaP, depending on the microbe, at pH 5.5, 6.5 or pH 7.3, which contained 0.25% glucose and 1% TSB, respectively. n: number of experiments.

**Supplementary Table 14 | Antimicrobial activity spectrum of Palmitoyl-HR1-18HR.\***

| Microorganism                              | n | LD100<br>(µg/mL) | LD90<br>(µg/mL) | Conditions             |
|--------------------------------------------|---|------------------|-----------------|------------------------|
| <i>Burkholderia cepacia</i> ATCC 25416     | 2 | 150              | 75              | pH 7.3, 1 % TSB        |
| <i>Burkholderia cepacia</i> ATCC 25416     | 2 | 300              | 75              | pH 7.3, 0.25% glucose  |
| <i>Prevotella oralis</i> ATCC 33321        | 1 | 75               | 37.5            | pH 7.3, 1 % TSB        |
| <i>Pseudomonas aeruginosa</i> ATCC10145    | 1 | 4.7              | 1.18            | pH 7.3, 1 % TSB        |
| <i>Pseudomonas aeruginosa</i> ATCC10145    | 2 | 0.59             | 0.038           | pH 5.5, 0.25% glucose  |
| <i>Clostridium perfringens</i> ATCC 13124  | 1 | 9.375            | 4.7             | pH 7.3, 0.25% glucose  |
| <i>Propionibacterium acnes</i> ATCC 6919   | 1 | 4.7              | 1.18            | pH 7.3, 1 % TSB        |
| <i>Staphylococcus aureus</i> ATCC 6538     | 2 | 4.7              | 0.3             | pH 5.5, 0.25% glucose  |
| <i>Staphylococcus aureus</i> ATCC 6538     | 1 | 9.38             | 1.18            | pH 7.3, 1 % TSB        |
| <i>Streptococcus pneumoniae</i> ATCC 33400 | 1 | 9.38             | 9.38            | pH 7.3, 0.25 % glucose |
| <i>Streptococcus pyogenes</i> ATCC 12344   | 1 | 0.3              | 0.15            | pH 7.3, 0.25 % glucose |

\* AA-sequence: Pal-GRRGSLGRSSSRGQRGSGSGR. Sensitivity of bacteria towards Pal-HR1-18HR was tested in a CFU assay system in 10 mM NaP, depending on the microbe, which contained 0.25% glucose and 1% TSB, respectively, at pH 5.5 or pH 7.3. n: number of experiments.

**Supplementary Table 15 | Results of a CIDAMP-MIC\*-screening at CO-ADD**

| Sample Name          | CO-ADD Sample ID | GN_001                                      | GN_003                                     | GN_004                                           | GN_042                                            | GP_020                                 | FW_001                                       | FW_002                                    | MA_007                       |
|----------------------|------------------|---------------------------------------------|--------------------------------------------|--------------------------------------------------|---------------------------------------------------|----------------------------------------|----------------------------------------------|-------------------------------------------|------------------------------|
|                      |                  | <i>E. coli</i><br>ATCC 29222<br>FDA control | <i>K. pneumoniae</i><br>ATCC 70593<br>DSMZ | <i>A. baumannii</i><br>ATCC 19606<br>Type strain | <i>P. aeruginosa</i><br>ATCC 27853<br>Type strain | <i>S. aureus</i><br>ATCC 43300<br>MRSA | <i>C. albicans</i><br>ATCC 90028<br>CSLI Ref | <i>C. neoformans</i><br>ATCC 20811<br>H99 | HEK293<br>ATCC CRL-1073      |
|                      |                  | MIC (µg/mL)                                 |                                            |                                                  |                                                   |                                        |                                              |                                           |                              |
|                      |                  | CGC (µg/mL)                                 |                                            |                                                  |                                                   |                                        |                                              |                                           |                              |
| LCE-2B74-86          | C0137532         | >32 (14.8%)<br>>32 (15.9%)                  | >32 (32.1%)<br>>32 (31.8%)                 | >32 (17.5%)<br>>32 (38.7%)                       | >32 (4.8%)<br>>32 (10.9%)                         | >32 (45.1%)<br>>32 (29.0%)             | >32 (4.0%)<br>>32 (-3.2%)                    | >32 (27.2%)<br>>32 (7.0%)                 | >32                          |
| LCE-3B56-68          | C0137533         | >32 (22.5%)<br>>32 (17.5%)                  | >32 (25.7%)<br>>32 (24.1%)                 | >32 (18.4%)<br>>32 (38.6%)                       | >32 (1.6%)<br>>32 (11.6%)                         | >32 (48.1%)<br>>32 (39.5%)             | >32 (0.8%)<br>>32 (0.1%)                     | 8 (95.9%)<br>8 (104.2%)                   | >32                          |
| LCE-3C56-67          | C0137534         | >32 (15.0%)<br>>32 (12.6%)                  | >32 (23.0%)<br>>32 (19.3%)                 | >32 (9.6%)<br>>32 (36.9%)                        | >32 (9.9%)<br>>32 (11.3%)                         | >32 (47.4%)<br>>32 (36.9%)             | >32 (6.2%)<br>>32 (5.7%)                     | 8 (97.8%)<br>8 (102.3%)                   | >32                          |
| LCE-3C56-75          | C0137535         | >32 (15.5%)<br>>32 (11.7%)                  | >32 (25.7%)<br>>32 (20.5%)                 | >32 (7.4%)<br>>32 (17.6%)                        | >32 (-0.4%)<br>>32 (4.9%)                         | >32 (41.5%)<br>>32 (25.2%)             | >32 (10.0%)<br>>32 (7.8%)                    | 4 (105.8%)<br>4 (105.3%)                  | >32                          |
| Pal-HR1-18-HR        | C0137536         | 4 (95.0%)<br>8 (96.0%)                      | 32 (82.9%)<br>32 (91.1%)                   | 4 (97.0%)<br>1 (98.3%)                           | 16 (97.5%)<br>32 (95.9%)                          | 4 (84.0%)<br>8 (83.4%)                 | 16 (99.0%)<br>16 (98.9%)                     | 1 (105.0%)<br>1 (106.1%)                  | >32                          |
| Pal-HR1-11-2H2R-14   | C0137537         | 8 (57.8%)<br>16 (95.8%)                     | >32 (32.7%)<br>>32 (36.7%)                 | 8 (98.3%)<br>4 (98.2%)                           | 32 (81.8%)<br>32 (93.4%)                          | 16 (95.0%)<br>8 (91.1%)                | >32 (36.3%)<br>>32 (31.7%)                   | 4 (107.3%)<br>4 (106.8%)                  | >32                          |
| Pal-GR13             | C0137538         | 4 (96.9%)<br>8 (95.1%)                      | 32 (91.9%)<br>16 (92.3%)                   | 2 (96.0%)<br>4 (97.0%)                           | 8 (96.3%)<br>8 (97.1%)                            | 0.5 (96.6%)<br>0.25 (99.4%)            | 4 (99.4%)<br>4 (99.1%)                       | 0.25 (109.2%)<br>0.25 (109.6%)            | >32                          |
| Pal-GR9              | C0137539         | >32 (28.9%)<br>>32 (36.6%)                  | >32 (25.4%)<br>>32 (21.3%)                 | >32 (16.9%)<br>>32 (28.1%)                       | >32 (13.4%)<br>>32 (12.9%)                        | 32 (84.0%)<br>32 (100.3%)              | >32 (5.7%)<br>>32 (2.7%)                     | >32 (-0.9%)<br>>32 (10.3%)                | >32                          |
| Pal-GR4              | C0137540         | >32 (14.2%)<br>>32 (11.2%)                  | >32 (19.2%)<br>>32 (23.1%)                 | 32 (82.8%)<br>32 (79.6%)                         | >32 (5.5%)<br>>32 (11.4%)                         | 8 (97.4%)<br>8 (98.1%)                 | 32 (79.8%)<br>8 (85.0%)                      | 2 (103.9%)<br>2 (106.3%)                  | >32                          |
| Pal-G-Dap4           | C0137541         | >32 (15.7%)<br>>32 (13.3%)                  | >32 (15.6%)<br>>32 (11.4%)                 | >32 (15.5%)<br>>32 (25.9%)                       | >32 (9.5%)<br>>32 (10.6%)                         | 8 (96.2%)<br>8 (99.0%)                 | 8 (97.2%)<br>16 (94.3%)                      | 1 (106.0%)<br>1 (105.9%)                  | >32                          |
| Pal-CE-3C55-67       | C0137542         | >32 (15.0%)<br>>32 (17.3%)                  | >32 (29.9%)<br>>32 (31.2%)                 | >32 (15.2%)<br>>32 (25.9%)                       | >32 (10.1%)<br>>32 (10.8%)                        | >32 (71.3%)<br>>32 (59.0%)             | 16 (93.9%)<br>10 (93.6%)                     | 2 (103.9%)<br>1 (107.8%)                  | >32                          |
| Pal-CE-3B56-68       | C0137543         | >32 (17.3%)<br>>32 (18.9%)                  | >32 (30.1%)<br>>32 (23.6%)                 | >32 (11.5%)<br>>32 (30.3%)                       | >32 (10.5%)<br>>32 (12.5%)                        | 16 (96.9%)<br>16 (97.6%)               | 1 (95.4%)<br>2 (98.3%)                       | 0.25 (105.7%)<br>0.25 (106.1%)            | >32                          |
| S-Pal-HRNR1748-1778  | C0137544         | >32 (13.0%)<br>>32 (11.6%)                  | >32 (17.2%)<br>>32 (22.9%)                 | >32 (12.7%)<br>>32 (21.6%)                       | >32 (5.2%)<br>>32 (12.2%)                         | >32 (59.0%)<br>>32 (32.0%)             | >32 (16.4%)<br>>32 (4.1%)                    | 4 (108.0%)<br>4 (104.7%)                  | >32                          |
| Pal-HR1-18-GR13      | C0137546         | 32 (95.8%)<br>>32 (40.2%)                   | >32 (19.3%)<br>>32 (13.9%)                 | 16 (99.5%)<br>16 (99.5%)                         | >32 (16.8%)<br>>32 (20.8%)                        | 16 (100.2%)<br>32 (78.1%)              | >32 (8.5%)<br>>32 (-0.8%)                    | 16 (104.6%)<br>32 (101.0%)                | >32                          |
| Pal-HR1-18           | C0142188         | >32 (9.8%)<br>>32 (15.6%)                   | >32 (11.5%)<br>>32 (10.5%)                 | 32 (91.0%)<br>32 (98.8%)                         | >32 (7.3%)<br>>32 (1.2%)                          | >32 (-2.7%)<br>>32 (7.5%)              | >32 (20.4%)<br>>32 (23.6%)                   | >32 (16.3%)<br>32 (102.7%)                | >32 (15.0%)<br>>32 (49.9%)   |
| Myr-HR1-18           | C0142189         | >32 (11.6%)<br>>32 (16.0%)                  | >32 (4.6%)<br>>32 (8.1%)                   | >32 (4.1%)<br>>32 (7.1%)                         | >32 (6.6%)<br>>32 (3.8%)                          | >32 (0.3%)<br>>32 (1.9%)               | >32 (9.1%)<br>>32 (0.0%)                     | >32 (-11.3%)<br>>32 (9.2%)                | >32 (9.8%)<br>>32 (60.9%)    |
| HR1-11 Palm          | C0142190         | >32 (11.4%)<br>>32 (8.3%)                   | >32 (1.3%)<br>>32 (5.6%)                   | >32 (3.1%)<br>>32 (6.5%)                         | >32 (7.4%)<br>>32 (5.4%)                          | >32 (-0.2%)<br>>32 (3.6%)              | >32 (15.3%)<br>>32 (4.4%)                    | >32 (-0.8%)<br>>32 (17.3%)                | >32 (24.1%)<br>>32 (29.2%)   |
| PalHR1-11-3H3R       | C0142191         | 32 (96.2%)<br>32 (95.6%)                    | >32 (5.6%)<br>>32 (-0.9%)                  | 8 (99.4%)<br>8 (102.2%)                          | >32 (11.9%)<br>>32 (9.9%)                         | >32 (15.1%)<br>>32 (18.6%)             | 32 (75.1%)<br>>32 (19.7%)                    | 32 (114.1%)<br>32 (94.6%)                 | >32 (7.2%)<br>>32 (19.9%)    |
| (D)PalGR13           | C0142192         | 8 (98.9%)<br>4 (97.3%)                      | 32 (89.5%)<br>32 (93.2%)                   | 4 (97.0%)<br>4 (98.0%)                           | 16 (97.5%)<br>16 (98.7%)                          | 2 (96.8%)<br>4 (95.5%)                 | 4 (98.7%)<br>4 (98.9%)                       | 2 (111.9%)<br>2 (131.9%)                  | >32 (8.2%)<br>>32 (31.4%)    |
| (D)PalGR9            | C0142193         | >32 (12.5%)<br>16 (98.0%)                   | >32 (4.7%)<br>>32 (9.2%)                   | >32 (6.2%)<br>>32 (9.9%)                         | >32 (19.6%)<br>>32 (6.1%)                         | >32 (41.1%)<br>32 (94.2%)              | >32 (16.5%)<br>>32 (9.6%)                    | >32 (83.3%)<br>>32 (83.1%)                | >32 (12.8%)<br>>32 (48.1%)   |
| Pal(D)GR4            | C0142194         | >32 (7.3%)<br>>32 (12.7%)                   | >32 (6.9%)<br>>32 (8.6%)                   | >32 (2.3%)<br>>32 (9.2%)                         | >32 (3.3%)<br>>32 (4.5%)                          | >32 (-2.2%)<br>>32 (12.4%)             | >32 (22.8%)<br>>32 (10.2%)                   | >32 (17.4%)<br>>32 (9.2%)                 | >32 (14.8%)<br>>32 (15.5%)   |
| Pal(D)GK4            | C0142195         | >32 (28.1%)<br>>32 (27.6%)                  | >32 (28.2%)<br>>32 (28.7%)                 | 32 (91.7%)<br>32 (93.6%)                         | >32 (4.9%)<br>>32 (4.8%)                          | 32 (99.0%)<br>32 (92.6%)               | >32 (50.4%)<br>>32 (31.2%)                   | 8 (95.3%)<br>16 (97.3%)                   | >32 (23.4%)<br>>32 (35.1%)   |
| Pal(D)GO 4           | C0142196         | >32 (4.9%)<br>>32 (13.2%)                   | >32 (6.6%)<br>>32 (8.7%)                   | >32 (36.2%)<br>>32 (41.8%)                       | >32 (7.6%)<br>>32 (2.6%)                          | >32 (18.5%)<br>>32 (20.7%)             | >32 (32.8%)<br>>32 (6.7%)                    | 32 (91.4%)<br>32 (94.6%)                  | >32 (8.4%)<br>>32 (25.2%)    |
| PalHR1-18-3H3R-GR13  | C0142197         | >32 (39.2%)<br>>32 (37.9%)                  | >32 (4.9%)<br>>32 (9.9%)                   | 16 (93.5%)<br>32 (98.3%)                         | >32 (7.3%)<br>>32 (1.7%)                          | >32 (25.3%)<br>>32 (38.4%)             | >32 (12.3%)<br>>32 (8.1%)                    | >32 (-7.5%)<br>>32 (11.0%)                | >32 (13.9%)<br>>32 (43.9%)   |
| HRNR136 b-1414-S-Pal | C0142198         | >32 (11.0%)<br>>32 (19.8%)                  | >32 (8.9%)<br>>32 (11.7%)                  | >32 (3.6%)<br>>32 (9.2%)                         | >32 (7.7%)<br>>32 (2.9%)                          | >32 (1.9%)<br>>32 (6.7%)               | >32 (52.4%)<br>>32 (7.0%)                    | >32 (2.5%)<br>>32 (6.5%)                  | >32 (21.8%)<br>>32 (34.9%)   |
| Pal-G-Dap4           | C0142199         | >32 (8.8%)<br>>32 (22.4%)                   | >32 (8.5%)<br>>32 (5.0%)                   | 32 (95.8%)<br>32 (99.8%)                         | >32 (9.1%)<br>>32 (9.3%)                          | 32 (95.0%)<br>32 (90.7%)               | >32 (45.9%)<br>>32 (24.5%)                   | >32 (58.8%)<br>16 (100.9%)                | >32 (27.8%)<br>>32 (52.9%)   |
| Pal-GR8              | C0142200         | >32 (14.2%)<br>>32 (12.9%)                  | >32 (4.8%)<br>>32 (8.4%)                   | >32 (12.0%)<br>>32 (12.9%)                       | >32 (5.0%)<br>>32 (8.7%)                          | 16 (83.5%)<br>16 (80.7%)               | >32 (24.3%)<br>>32 (62.9%)                   | 32 (93.1%)<br>16 (95.1%)                  | >32 (8.4%)<br>>32 (53.4%)    |
| Pal-Om-GR13          | C0142201         | 32 (96.1%)<br>32 (96.0%)                    | >32 (54.1%)<br>>32 (46.5%)                 | 32 (94.7%)<br>32 (95.5%)                         | 32 (88.1%)<br>32 (96.1%)                          | 32 (88.0%)<br>32 (92.3%)               | 32 (98.8%)<br>32 (88.8%)                     | 32 (96.4%)<br>32 (108.5%)                 | >32 (41.1%)<br>>32 (37.5%)   |
| Pal-GK4              | C0142202         | >32 (18.5%)<br>>32 (20.0%)                  | >32 (4.1%)<br>>32 (4.0%)                   | >32 (45.7%)<br>>32 (32.9%)                       | >32 (8.8%)<br>>32 (9.7%)                          | >32 (1.2%)<br>>32 (-22.2%)             | 16 (90.1%)<br>0.5 (97.5%)                    | 32 (85.2%)<br>32 (89.6%)                  | >32 (32.9%)<br>>32 (25.9%)   |
| S-Pal-HRNR2004-2029  | C0142203         | >32 (15.0%)<br>>32 (11.6%)                  | >32 (4.8%)<br>>32 (4.6%)                   | >32 (58.2%)<br>>32 (58.5%)                       | >32 (10.8%)<br>>32 (8.4%)                         | >32 (18.2%)<br>>32 (6.1%)              | >32 (63.9%)<br>16 (81.1%)                    | 4 (91.0%)<br>8 (92.9%)                    | 22.8 (60.4%)<br>28.6 (56.9%) |
| Pal-K-GR13           | C0142204         | 16 (103.3%)<br>16 (101.7%)                  | >32 (80.1%)<br>>32 (48.5%)                 | 32 (100.8%)<br>32 (100.1%)                       | 32 (100.1%)<br>32 (100.4%)                        | 32 (98.4%)<br>>32 (56.6%)              | 32 (94.1%)<br>32 (98.1%)                     | 32 (97.0%)<br>32 (91.3%)                  | >32 (22.7%)<br>>32 (18.6%)   |
| Pal-GR11             | C0142205         | 8 (101.4%)<br>16 (99.9%)                    | >32 (40.4%)<br>32 (88.5%)                  | 8 (97.3%)<br>5 (98.1%)                           | 16 (96.8%)<br>16 (99.5%)                          | 4 (99.3%)<br>4 (97.3%)                 | 4 (97.7%)<br>8 (98.0%)                       | 4 (95.3%)<br>4 (99.8%)                    | >32 (36.8%)<br>>32 (29.2%)   |
| C-Pal-GR13           | C0142220         | 32 (84.2%)<br>32 (93.9%)                    | >32 (48.3%)<br>>32 (55.3%)                 | 32 (84.6%)<br>32 (79.4%)                         | 32 (85.2%)<br>32 (84.6%)                          | 4 (95.3%)<br>4 (94.5%)                 | 2 (98.9%)<br>2 (98.6%)                       | 0.5 (95.2%)<br>1 (99.5%)                  | >32 (41.8%)<br>>32 (15.1%)   |
| S-C-Pal-GR13         | C0142221         | 16 (101.6%)<br>32 (97.4%)                   | 32 (92.4%)<br>32 (97.3%)                   | 32 (90.6%)<br>32 (92.7%)                         | 32 (97.1%)<br>32 (97.4%)                          | 4 (98.1%)<br>4 (94.8%)                 | 4 (99.5%)<br>4 (98.6%)                       | 2 (93.1%)<br>2 (95.9%)                    | >32 (35.1%)<br>>32 (40.1%)   |
| LCE1B 7B-88          | C0142222         | >32 (3.8%)<br>>32 (17.4%)                   | >32 (0.4%)<br>>32 (6.1%)                   | >32 (6.4%)<br>>32 (2.9%)                         | >32 (9.7%)<br>>32 (8.6%)                          | >32 (11.2%)<br>>32 (11.2%)             | >32 (18.3%)<br>>32 (5.2%)                    | >32 (2.7%)<br>>32 (-5.8%)                 | >32 (24.4%)<br>>32 (24.9%)   |
| LCE2A 7B-82          | C0142228         | >32 (14.8%)<br>>32 (20.1%)                  | >32 (3.0%)<br>>32 (6.8%)                   | >32 (7.6%)<br>>32 (10.3%)                        | >32 (8.6%)<br>>32 (7.3%)                          | >32 (16.8%)<br>>32 (15.3%)             | >32 (10.4%)<br>>32 (9.7%)                    | >32 (-1.5%)<br>>32 (-8.4%)                | >32 (8.6%)<br>>32 (6.6%)     |
| LCE3A 5B-80          | C0142229         | >32 (12.7%)<br>>32 (14.4%)                  | >32 (3.8%)<br>>32 (7.5%)                   | >32 (6.6%)<br>>32 (3.9%)                         | >32 (6.3%)<br>>32 (4.0%)                          | >32 (16.0%)<br>>32 (12.6%)             | >32 (23.6%)<br>>32 (13.6%)                   | >32 (-4.3%)<br>>32 (-13.0%)               | >32 (18.2%)<br>>32 (6.6%)    |
| LCE3C 55-66          | C0142231         | >32 (7.7%)<br>>32 (11.2%)                   | >32 (4.5%)<br>>32 (5.7%)                   | >32 (7.9%)<br>>32 (18.0%)                        | >32 (13.8%)<br>>32 (6.2%)                         | >32 (12.9%)<br>>32 (5.8%)              | >32 (17.8%)<br>>32 (18.5%)                   | >32 (-4.0%)<br>>32 (-5.1%)                | >32 (26.9%)<br>>32 (24.0%)   |
| LCE3D 55-64          | C0142232         | >32 (1.9%)<br>>32 (7.9%)                    | >32 (2.6%)<br>>32 (2.2%)                   | >32 (0.3%)<br>>32 (5.2%)                         | >32 (8.7%)<br>>32 (5.2%)                          | >32 (9.1%)<br>>32 (5.2%)               | >32 (15.5%)<br>>32 (7.8%)                    | >32 (-0.6%)<br>>32 (-1.5%)                | >32 (39.8%)<br>>32 (23.4%)   |

\* Minimal inhibitory concentration (MIC) values were determined using the broth microdilution susceptibility test according to the CLSI (Clinical and Laboratory Standards Institute) guidelines in Mueller–Hinton (MH) broth on  $5 \times 10^5$  CFU/mL. They were defined as the lowest peptide concentration that prevented visible bacterial growth after incubation for 18 h at 37 °C. Results are from “Community for Open Antimicrobial Drug Discovery, CO-ADD”. Further details of the screening experiments are available from <http://www.co-add.org/file/co-add-workflowscreeningpdf-0>.

**Supplementary Table 16 | Structures of CIDAMPs tested at conditions recommended by CLSI.**

| Name                  | AA-sequence                                                                                          |
|-----------------------|------------------------------------------------------------------------------------------------------|
| LCE-2B 74-86          | SHHRPRLFRRRH                                                                                         |
| LCE-3B 56-68          | SHHRCCRSRRCRR                                                                                        |
| LCE-3C 55-67          | SHHRHFRSHQCRR                                                                                        |
| LCE-3C 55-75          | SHHRHFRSHQCRRQRNSNSCDR                                                                               |
| Pal-HR 1-18-HR        | Pal-GRRGSGLGRSSSRGQRGSGSGR                                                                           |
| Pal-HR-1-11-2H2R-14   | Pal-RGSRSGQSSRGERR                                                                                   |
| Pal-GR13              | Pal-GRRGGRGGRGRGR                                                                                    |
| Pal-GR9               | Pal-GRRGGRGGR                                                                                        |
| Pal-GR4               | Pal-GRGR                                                                                             |
| Pal-G-Dap4            | Pal-GDapGDap                                                                                         |
| Pal-LCE-3C 55-67      | Pal-SHHRHFRSHQCRR                                                                                    |
| Pal-LCE-3B 56-68      | Pal-SHHRCCRSRRCRR                                                                                    |
| S-Pal-HRNR 1748-1778  | SGHSSVFGQHESGSGHSSAYSQHGSGSGHFC-Pal-NH2                                                              |
| Pal-HR 1-18 GR13      | Pal-GRRGSGLGRSSSR                                                                                    |
| Pal-HR1-18            | Pal-GRHGSGLGHSSSHGQHGSGSGR                                                                           |
| Myr-HR1-18            | Myr-GRHGSGLGHSSSHGQHGSGSGR                                                                           |
| HR-1-11-Palm          | Pal-HGSRSGQSSRGERHGSSSGSSSH                                                                          |
| Pal-HR-1-11-3H3R      | Pal-RGSRSGQSSRGERRGSSSGSSSR                                                                          |
| (D)-Pal-GR13          | Pal-GR <sub>D</sub> R <sub>D</sub> GGR <sub>D</sub> GGR <sub>D</sub> GR <sub>D</sub> GR <sub>D</sub> |
| (D)-Pal-GR9           | Pal-GR <sub>D</sub> R <sub>D</sub> GGR <sub>D</sub> GGR <sub>D</sub>                                 |
| (D)-Pal-GR4           | Pal-GR <sub>D</sub> GR <sub>D</sub>                                                                  |
| (D)-Pal-GK4           | Pal-GK <sub>D</sub> GK <sub>D</sub>                                                                  |
| (D)-Pal-GO4           | Pal-GO <sub>D</sub> GO <sub>D</sub>                                                                  |
| Pal-HR-1-18-3H3R-GR13 | Pal-GRRGSGLGRSSSR                                                                                    |
| HRNR 1389-1414-S-Pal  | GRHGSGSGQSSGFGHHESSWQSSGC-Pal-NH2                                                                    |
| Pal-GDab4             | Pal-GDabGDab                                                                                         |
| PalGR6                | Pal-GRRGGR                                                                                           |
| Pal-OrnGR13           | Pal-GOOGGOGGOGGOGO                                                                                   |
| Pal-GK4               | Pal-GK <sub>D</sub> GK <sub>D</sub>                                                                  |
| S-Pal-HRNR2004-2029   | GQHSSSGHSSSHGQHGASGQSSSC-Pal-NH2                                                                     |
| Pal-K-GR13            | Pal-GKKGGKGGKGGKGGK                                                                                  |
| Pal-GR11              | Pal-GRRGGRGGRGRGR                                                                                    |
| C-Pal-GR13            | GRRGGRGGRGRGR-C-Pal-NH2                                                                              |
| 8 C-Pal-GR13          | GRRGGRG-C-Pal-GRGRGR                                                                                 |
| LCE1B 78-88           | SHHRRRRSHCH                                                                                          |
| LCE2A 70-82           | SHHRPRLFHRRRH                                                                                        |
| LCE3A 50-60           | SHHRCRRSHRC                                                                                          |
| LCE3C 55-66           | SHHRHFRSHQCRR                                                                                        |
| LCE3D 55-64           | NHHRHHRCR                                                                                            |

Residues cationic at pH 7, cationic only at pH < 6, and anionic at pH 7 are colored blue, green and magenta, respectively. Dab:L-2,4-Diaminobutyric acid, Dap:L-2,3-Diaminopropionic acid.



**Supplementary Table 17 | HRNR-primer-sequences used in this study**

| Name                     | Primer Sequence                                    | A.-T. | D.-T:  |
|--------------------------|----------------------------------------------------|-------|--------|
| pSu-hr3-a-2576-f (Bsal)  | <u>AAGGTCTCAAGGTGGCTTTGGTCACCACGAGT</u>            | 60°C  | 79,1°C |
| pSu-hr3-b-2591-f (Bsal)  | <u>AAGGTCTCAAGGTAGTCAGCATGGGTCTGGCT</u>            | 60°C  | 77,1°C |
| pSu-hr3-c-2638-f (Bsal)  | <u>AAGGTCTCAAGGTCAGTCTTCGGGCCACGGC</u>             | 62°C  | 82,3°C |
| pSu-hr3-d-2656-f (Bsal)  | <u>AAGGTCTCAAGGTGGCCGACATGGGTCCGGT</u>             | 62°C  | 83,7°C |
| pSu-hr3-e-2658-f (Bsal)  | <u>AAGGTCTCAAGGTCATGGGTCCGGTTTGGGG</u>             | 60°C  | 81,6°C |
| pSu-hr3-a-2707-r (BamHI) | <u>AAGGATCCTTAGTAAGCAGAGGAATGTCCTG</u>             | 60°C  | 70,8°C |
| pSu-hr3-b-2684-r (BamHI) | <u>AAGGATCCTTAATATGGGCCACGGCTGGAA</u>              | 60°C  | 77,4°C |
| pSu-hr3-d-2618-r (BamHI) | <u>AAGGATCCTTATCGTTACCCCTAGATGACTG</u>             | 64°C  | 73,5°C |
| pSu-hr3-e-2609-r (BamHI) | <u>AAGGATCCTTATCTAGAGCCGTGTTGTCCGT</u>             | 62°C  | 73,9°C |
| pSu-hr3-f-2644-r (BamHI) | <u>AAGGATCCTTAACGGGAGCCAGACCCATG</u>               | 60°C  | 77,4°C |
| hr3-2662G-f              | <u>GTCCGGTGGCGGGCACTCCTCCAG</u>                    | 72°C  | 82,1°C |
| hr3-2662G-r              | <u>GTGCCCGCCACCGGACCCATGTCG</u>                    | 72°C  | 84,9°C |
| hr3-2629G-f              | <u>CACGGTGGTCAGCATGGGTCTGG</u>                     | 68°C  | 76,7°C |
| hr3-2629G-r              | <u>GCTGACCACCGTGGGAAGACGAACC</u>                   | 74°C  | 77,6°C |
| hr3-2603G-f              | <u>CTGGCGGCGGACAACACGGCTC</u>                      | 68°C  | 80,3°C |
| hr3-2603G-r              | <u>TGTTGTCCGCCGACAGAGGAGTG</u>                     | 68°C  | 78,1°C |
| Su3-hr3-2684G-r (BamHI)  | <u>AAAGGATCCTCAACCTGGGCCACGGCTGGAAGA</u>           | 62°C  | 83,8°C |
| pESu3-hrnr-3-f (FokI)    | <u>AAGGGGATGAGCATGATTAGGTAAACTCCTACAAGGCGTCATC</u> | 62°C  | 80,3°C |
| pESu3-hrnr-244-r (XhoI)  | <u>AAGGCTCGAGTCAGTAACCAGAGGACTGCC</u>              | 58°C  | 77,8°C |
| pESu3-hrnr-82-f (FokI)   | <u>AAGGGGATGAGCATGATTAGGTGTTGAGGCTCGTAATAAAATC</u> | 58°C  | 79,0°C |
| pESu3-hrnr-245-f (FokI)  | <u>AAGGGGATGAGCATGATTAGGTAGTCAGCATGGATCTGGC</u>    | 56°C  | 81,8°C |
| pESu3-hrnr-478-r (XhoI)  | <u>AAGGCTCGAGTCAGTAACCAGAGGAATGCTCT</u>            | 56°C  | 75,1°C |
| HRNR-2591-f-CyBr (SbfI)  | <u>AACCCTGCAGGAGATGAGTCAGCATGGGTCTGGCT</u>         | 74°C  | 83,6°C |

A.-T.: Annealing temperature; D.-T.: Detection temperature. The complementary coding sequence is underlined.

## REFERENCES

93. Schechter, I. & Berger, A. On the size of the active site in proteases. I. Papain. *Biochem. Biophys. Res. Commun.* **27**, 157–162 (1967).
94. Deng, X., Eickholt, J. & Cheng, J. PreDisorder: ab initio sequence-based prediction of protein disordered regions. *BMC Bioinformatics* **10**, 436 (2009).
95. McGuffin, L. J. Intrinsic disorder prediction from the analysis of multiple protein fold recognition models. *Bioinforma. Oxf. Engl.* **24**, 1798–1804 (2008).
96. Ward, J. J., Sodhi, J. S., McGuffin, L. J., Buxton, B. F. & Jones, D. T. Prediction and functional analysis of native disorder in proteins from the three kingdoms of life. *J. Mol. Biol.* **337**, 635–645 (2004).
